# Identification and trajectory of growth of concerning SARS-CoV-2 variants in Houston, Texas, January through April 2021 based on 11,568 genome sequences

Randall J. Olsen,<sup>a,b,1</sup> Paul A. Christensen,<sup>a,1</sup> S. Wesley Long,<sup>a,b,1</sup> Sishir Subedi,<sup>a,1</sup> Parsa Hodjat,<sup>a</sup> Robert Olson,<sup>c,d</sup> Marcus Nguyen,<sup>c,d</sup> James J. Davis,<sup>c,d</sup> Prasanti Yerramilli,<sup>a</sup> Matthew Ojeda Saavedra,<sup>a</sup> Layne Pruitt,<sup>a</sup> Kristina Reppond,<sup>a</sup> Madison N. Shyer,<sup>a</sup> Jessica Cambric,<sup>a</sup> Ryan Gadd,<sup>a</sup> Ilya J. Finkelstein,<sup>e</sup> Jimmy Gollihar,<sup>a,f</sup> and James M. Musser<sup>a,b#</sup>

*From the <sup>a</sup>Center for Molecular and Translational Human Infectious Diseases Research, Department of Pathology and Genomic Medicine, Houston Methodist Research Institute and Houston Methodist Hospital, 6565 Fannin Street, Houston, Texas, 77030*

*<sup>b</sup> Departments of Pathology and Laboratory Medicine, and Microbiology and Immunology, Weill Cornell Medical College, 1300 York Avenue, New York, New York, 10065*

*<sup>c</sup> Consortium for Advanced Science and Engineering, 22 University of Chicago, 5801 South Ellis Avenue, Chicago, Illinois, 60637*

*<sup>d</sup> Computing, Environment and Life Sciences, Argonne National Laboratory, 9700 South Cass Avenue, Lemont, Illinois, 60439*

*<sup>e</sup> Department of Molecular Biosciences and Institute of Molecular Biosciences, The University of Texas at Austin, Austin, Texas 78712*

*<sup>f</sup> CCDC Army Research Laboratory-South, University of Texas, Austin, Texas 78712*

Running head (40 characters or less): SARS-CoV-2 concerning variants in Houston

<sup>1</sup>Contributed equally.

# Address correspondence to James M. Musser, M.D., Ph.D., Department of Pathology and Genomic Medicine, Houston Methodist Research Institute, 6565 Fannin Street, Suite B490, Houston, Texas 77030. Tel: 713.441.5890, E-mail: [jmmusser@houstonmethodist.org](mailto:jmmusser@houstonmethodist.org).

Disclosures: None.

## Abstract

Genetic variants of the SARS-CoV-2 virus are of substantial concern because they can detrimentally alter the trajectory of the ongoing pandemic, and disease course in individual patients. Here we report genome sequences from 11,568 COVID-19 patients in the Houston Methodist healthcare system dispersed throughout the metroplex that were diagnosed from January 1, 2021 through April 30, 2021. This sample represents 94% of Houston Methodist cases and 4.6% of all reported cases in the metropolitan area during this period. The SARS-CoV-2 variant designated UK B.1.1.7 increased very rapidly, and now causes 75%-90% of all new cases in the Houston area. Five of the 2,543 B.1.1.7 genomes had an E484K change in spike protein. Compared with non-B.1.1.7 patients, individuals infected with B.1.1.7 had a significantly lower cycle threshold value (considered to be a proxy for higher virus load) and higher rate of hospitalization. Other variants (e.g., B.1.429, B.1.427, P.1, P.2, and R.1) also increased rapidly in frequency, although the magnitude was less than for B.1.1.7. We also identified 42 patients with a recently described R.1 variant that has an E484K amino acid replacement, and seven patients with the B.1.617 “India” variants. In the aggregate, our study shows the occurrence of a diverse array of concerning SARS-CoV-2 variants circulating in a major metropolitan area, documents B.1.1.7 as the major cause of new cases in Houston and heralds the arrival and spread of B.1.617 variants in the metroplex.

## [Introduction]

The global pandemic caused by SARS-CoV-2 that began in early 2020 has proved to be challenging for every academic health center and health system, hospital, and public health system in the United States and countries worldwide.<sup>1-7</sup> The pandemic has also provided unprecedented opportunities for basic and translational research in all biomedical fields. We have systematically analyzed the molecular population genomics of SARS-CoV-2 in the ethnically and socioeconomically diverse metropolitan Houston area (population 7 million) since the first COVID-19 cases were reported in very early March 2020.<sup>8-11</sup> Our studies are facilitated by a central molecular diagnostic laboratory that comprehensively identifies and retains all COVID-19 diagnostic specimens from our large healthcare system that includes eight hospitals, emergency care clinics, and outpatient centers distributed throughout the metropolitan region. In addition, we have leveraged our longstanding interest in pathogen genomics and sequencing infrastructure to investigate the spread of SARS-CoV-2 in metropolitan Houston.<sup>8-16</sup> Among other discoveries, we have reported that the SARS-CoV-2 viruses causing infections in the earliest phase of the pandemic affecting Houston had substantial genomic diversity and are progeny of strains derived from several continents, including Europe and Asia.<sup>8,9</sup> These findings indicated that SARS-CoV-2 was introduced into our region many times independently by individuals who had traveled from different parts of the country and the world. Subsequently, sequence analysis of 5,085 genomes causing the first disease wave and massive second disease wave in Houston showed that all strains in the second wave had a Asp614Gly amino acid replacement in the spike protein.<sup>9</sup> Importantly, this study was the first analysis of the molecular architecture of SARS-CoV-2 in two infection waves in any major metropolitan region. The



Asp614Gly polymorphism increases human transmission and infectivity *in vitro* and *in vivo* in animal infection models.<sup>17-22</sup>

One key goal since the start of the pandemic has been to sequence all positive SARS-CoV-2 specimens and rapidly identifying mutations that may be associated with detrimental patient outcome, including therapeutic or vaccine failure. Similarly, with the recognition of an increasing number of SARS-CoV-2 variants of interest (VOIs) and variants of concern (VOCs) by public health agencies such as the United States Centers for Disease Control and Prevention (CDC), World Health Organization (WHO), and Public Health England (PHE)

(<https://www.cdc.gov/coronavirus/2019-ncov/cases-updates/variant-surveillance/variant-info.html>, last accessed: May 16, 2021; <https://www.who.int/csr/don/31-december-2020-sars-cov2-variants/en/>, last accessed: May 16, 2021;

<https://www.gov.uk/government/collections/new-sars-cov-2-variant>, last accessed: May 16, 2021), there is now substantial domestic and international need to identify these virus genotypes rapidly and understand their velocity and patterns of dissemination. In particular, VOC UK B.1.1.7 is of special interest because it has the ability to transmit very effectively, spread through populations rapidly, and has been reported to have a significantly higher mortality rate than non-B.1.1.7 infections (<https://virological.org/t/preliminary-genomic-characterisation-of-an-emergent-sars-cov-2-lineage-in-the-uk-defined-by-a-novel-set-of-spike-mutations/563>, last

accessed: May 17, 2020,

[https://assets.publishing.service.gov.uk/government/uploads/system/uploads/attachment\\_data/file/947048/Technical\\_Briefing\\_VOC\\_SH\\_NJL2\\_SH2.pdf](https://assets.publishing.service.gov.uk/government/uploads/system/uploads/attachment_data/file/947048/Technical_Briefing_VOC_SH_NJL2_SH2.pdf), last accessed: May 17, 2020,

<https://app.box.com/s/3lkcbxepqixkg4mv640dpvvg978ixjtf/file/756963730457>, last accessed: May 17, 2020, <https://cmmid.github.io/topics/covid19/uk-novel-variant.html>, last accessed: May

17, 2020, <https://virological.org/t/lineage-specific-growth-of-sars-cov-2-b-1-1-7-during-the-english-national-lockdown/575>, last accessed: May 17, 2020).<sup>23-37</sup> VOCs known as B.1.351 and P.1, found to cause widespread disease in South Africa and Brazil, respectively, have sequence changes in spike protein that make them less susceptible to host and some therapeutic antibodies.<sup>38-41</sup> Recently two additional VOCs (B.1.427 and B.1.429) were recognized by the CDC in part because of their rapid transmission in many California communities.<sup>42</sup> (<https://outbreak.info/situation-reports?pango=B.1.427>, last accessed May 17, 2021, <https://outbreak.info/situation-reports?pango=B.1.4279>, last accessed May 17, 2021)

Based on sequencing 20,453 SARS-CoV-2 genomes causing COVID-19 disease in Houston, we recently reported that all VOIs and VOCs are circulating in the metropolitan region, making it the first community to document their presence.<sup>10</sup> A follow-up study<sup>11</sup> reported rapid increase of VOC UK B.1.1.7 in Houston; we estimated the variant had a doubling time of approximately 7 d. This rapid B.1.1.7 growth trajectory, raised the concern that this variant would cause nearly all new COVID-19 cases in metropolitan Houston by the end of March or early April 2021. This time frame is similar to an estimate made in late January by the CDC.<sup>34</sup>

Here we report data for 11,568 unique patients diagnosed between January 1, 2021 and April 30, 2021 infected with SARS-CoV-2, including 2,543 patients with the UK B.1.1.7 variant and 347 patients with infections caused by either B.1.429 or B.1.427, two closely related “California” VOC. We report that at the end of April, depending on the day, 75%-90% of all new cases of COVID-19 in metropolitan Houston were caused by B.1.1.7. Linked medical record information available for virtually all sequenced genomes permitted us to study the relationship between virus genotypes and patient phenotypes. Patients infected with B.1.1.7 had a significantly lower cycle threshold value in nasopharyngeal specimens (considered to be a proxy

for higher virus load) and higher hospitalization rate compared with non-B.1.1.7 patients. There was no difference between these two groups in hospital length of stay or mortality. Five of the 2,543 B.1.1.7 genomes had an E484K change in spike protein that reduces binding by some neutralizing antibodies. Unexpectedly, we found five cases of B.1.1.7 in early December, resulting in a revised time frame for the introduction of this variant to Houston. We also identified seven patients with COVID-19 caused by B.1.617.1 or B.1.617.2, variants reported to be causing widespread disease and extensive public health concern in India.<sup>43-48</sup> In the aggregate, our genome data show that VOC and VOI now account for the great majority of all new COVID-19 cases in our region.

## Materials and Methods

### Patient Specimens

Specimens were obtained from registered patients at Houston Methodist hospitals, associated facilities (e.g. urgent care centers), or institutions in the Houston metropolitan region that use our laboratory services. Virtually all individuals had signs or symptoms consistent with COVID-19 disease. We analyzed a comprehensive sample obtained from January 1, 2021 through April 30, 2021. This time frame was chosen for convenience because it represents the period during which at the onset of the study, we identified an uptick in identification of VOI and VOC. The study included 11,568 unique patients. The work was approved by the Houston Methodist Research Institute Institutional Review Board (IRB1010-0199).

## SARS-CoV-2 Molecular Diagnostic Testing

Specimens obtained from symptomatic patients with a suspicion for COVID-19 disease were tested in the Molecular Diagnostics Laboratory at Houston Methodist Hospital using assays granted Emergency Use Authorization (EUA) from the FDA (<https://www.fda.gov/medical-devices/emergency-situations-medical-devices/faqs-diagnostic-testing-sars-cov-2#offeringtests>).

As a hedge against supply chain strictures, multiple molecular testing platforms were used, including the COVID-19 test or RP2.1 test with BioFire Film Array instruments, the Xpert Xpress SARS-CoV-2 test using Cepheid GeneXpert Infinity or Cepheid GeneXpert Xpress IV instruments, the cobas SARS-CoV-2 & Influenza A/B Assay using the Roche Liat system, the SARS-CoV-2 Assay using the Hologic Panther instrument, the Aptima SARS-CoV-2 Assay using the Hologic Panther Fusion system, the Cobas SARS-CoV-2 test using the Roche 6800 system, and the SARS-CoV-2 assay using Abbott Alinity m instruments. The great majority of tests were performed on material obtained from nasopharyngeal swabs immersed in universal transport media (UTM); oropharyngeal or nasal swabs, bronchoalveolar lavage fluid, or sputum treated with dithiothreitol (DTT) were sometimes used. Standardized specimen collection methods were used (<https://vimeo.com/396996468/2228335d56>).

## SARS-CoV-2 Genome Sequencing

Libraries for whole virus genome sequencing were prepared according to version 3 of the ARTIC nCoV-2019 sequencing protocol (<https://artic.network/ncov-2019>). We used a semi-automated workflow that employed BioMek i7 liquid handling workstations (Beckman Coulter Life Sciences) and MANTIS automated liquid handlers (FORMULATRIX). Short sequence

reads were generated with a NovaSeq 6000 instrument (Illumina). For continuity of the epidemiologic analysis in the study period, we included some genome sequences reported in a recent publication.<sup>10</sup>

## SARS-CoV-2 Genome Sequence Analysis and Identification of Variants

Viral genomes were assembled with the BV-BRC SARS-Cov2 assembly service (<https://www.bv-brc.org/app/ComprehensiveSARS2Analysis>). The One Codex SARS-CoV-2 variant calling and consensus assembly pipeline was used to assemble all sequences (<https://github.com/onecodex/sars-cov-2.git>) using default parameters and a minimum read depth of 3. Briefly, the pipeline uses seqtk version 1.3-r116 for sequence trimming (<https://github.com/lh3/seqtk.git>); minimap version 2.1 for aligning reads against reference genome Wuhan-Hu-1 (NC\_045512.2); samtools version 1.11 for sequence and file manipulation; and iVar version 1.2.2 for primer trimming and variant calling. Genetic lineages, VOC, and VOI were identified based on genome sequence data and designated by Pangolin v. 2.4.2 with pangoLEARN module 2021-04-28 (<https://cov-lineages.org/pangolin.html>).

## Patient Metadata and Geospatial Analysis

Patient metadata were acquired from the electronic medical record by standard informatics methods (**Table 1**). Patient home address zip codes were used to visualize the geospatial distribution of spread for each VOC and VOI. Figures were generated with Tableau version 2020.3.4 (<https://www.tableau.com/>).

## Results

## Epidemiologic Trajectory and Patient Overview

Metropolitan Houston has experienced three distinct epidemiologic peaks of COVID-19 (**Figure 1**). The timing and shape of the epidemiologic curve for Houston Methodist patients mirrors the curve for the metropolitan region (<https://covid-harriscounty.hub.arcgis.com/pages/cumulative-data>). The third wave of COVID-19 started in approximately early November, following a prolonged disease trough occurring after the second wave (**Figure 1**). We studied 11,568 patients from January 1, 2021 through April 30, 2021, a period during which most of the variants were initially identified in Houston and several of them increased substantially (**Figure 2, Table 1, Supplemental Figure 1**).

The median age of the patients studied was 53.0 years and 53% were female; 5,534 (47.8%) of the patients required hospitalization. The ethnic distribution of the patients (**Table 1**) broadly reflects metropolitan Houston, which has a majority-minority population composition. Median length of stay was (5.2 days), and the 28-day mortality rate was 4.6%.

## Occurrence of VOI and VOC

The CDC has identified eight VOI (B.1.525, B.1.526, B.1.526.1, P.2, B.1.617, B.1.617.1, B.1.617.2, B.1.617.2) and five VOC (B.1.1.7, P.1, B.1.351, B.1.427, and B.1.429) based on heightened concern about potential or proven threat to public health and individual patients. The following VOI were identified in our comprehensive sample of 11,568 genome sequences: B.1.525 ( $n = 23$ ), B.1.526 ( $n = 32$ ), B.1.526.1 ( $n = 7$ ), P.2 ( $n = 69$ ), and B.1.617.1 ( $n = 5$ ), B.1.617.2 ( $n = 2$ ) All five VOC were found, including B.1.1.7 ( $n = 2,543$ ), P.1 ( $n = 50$ ), B.1.351

( $n = 4$ ), B.1.427 ( $n = 66$ ), and B.1.429 ( $n = 281$ ) (**Figure 2, Supplemental Figure 1, Supplemental Figure 2; Table 1**). B.1.1.7 rapidly increased and now dominates the new-infection landscape in Houston (**Figure 2**). By the end of April, the B.1.1.7 variant caused 75%-90% of all new COVID-19 cases. In addition, we found that cases caused by variants P.1, P.2, and B.1.429 also increased during the study period, although not to the magnitude of B.1.1.7 infections (**Figure 2**).

## Variants Genetically Related to B.1.617

Although comprehensive data are not available from India, the B.1.617, B.1.617.1, B.1.617.2, and B.1.617.3 variants were recently described as causing widespread COVID-19 disease in that country<sup>43-45</sup> (<https://www.who.int/publications/m/item/weekly-epidemiological-update-on-covid-19---11-may-2021>, last accessed May 16, 2021) and have been designated as VOI by the CDC. Variant B.1.617 is resistant to the monoclonal antibody Bamlanivimab (LY-Cov555), as assessed by an *in vitro* host-cell entry assay,<sup>46</sup> and B.1.617.1 has been reported to be highly virulent in hamsters following intranasal inoculation.<sup>45</sup> These two variants are characterized by a core group of four amino acid replacements in spike protein: L452R, E484Q, D614G, and P681R. We identified five patients infected with the B.1.617.1 variant, including two in March 2021, and three in April. We identified two patients with the B.1.617.2 variant in April 2021. Two of the patients with B.1.617.1 had a recent travel history to a high-prevalence country. Among these seven B.1.617.1 and B.1.617.2 variant samples, we also found five

additional changes in spike protein, including del69-70, T95I, G142D, E154K, Q1071H, and H1101D. Based on the combination of spike amino acid changes, there were four distinct B.1.617.1 variants (del69-70, L452R, D614G, P681H; T95I, G142D, E154K, L452R, E484Q, D614G, P681R, Q1071H; G142D, E154K, L452R, E484Q, D614G, P681R Q1071H, H1101D; and G142D, E154K, L452R, E484Q, D614G, V615I, P681R Q1071H and H1101D), and two B.1.617.2 variants (T19R, del157-158, L452R, T478K, D614G, P681R, D950N; and T19R, del157-158, A222V, L452R, T478K, D614G, P681R, D950N) (**Supplemental Figure 2**). The patients with B.1.617.2 had no documented travel history.

The N440K amino acid change in spike protein has recently been of interest because samples with this polymorphism have been reported to cause widespread COVID-19 in some states in India, increase viral titer *in vitro*, and have been associated with resistance to some candidate monoclonal antibody therapies.<sup>49, 50</sup> We identified five patients with this replacement, and all had the identical combination of spike amino acid replacements: L18R, T95I, R158S, N440K, D614G, P681H, A688V, S735A, T1027I. Pangolin categorized these strains as B.1. These five individuals were from three separate zip codes dispersed throughout metropolitan Houston (data not shown). Four of the five patients required hospitalization, and all were subsequently discharged.

### Cycle Threshold (Ct) Value Comparison of B.1.1.7 and Non-B.1.1.7 Samples

Early in the pandemic it was reported<sup>9, 17</sup> that nasopharyngeal samples from patients infected with strains having the spike protein 614Gly variant have, on average, significantly lower Ct



values (considered to be a proxy for higher virus loads) on initial diagnosis. Most authorities think that higher virus load in the upper respiratory tract is related to ability to efficiently spread and infect others, although there are many factors that contribute to transmission and disease. We first tested the hypothesis that specimen from patients with B.1.1.7 infections had lower Ct values compared to non-B.1.1.7 patients based on data generated by the Abbott Alinity m or Hologic Panther molecular diagnostic assays. Consistent with the hypothesis, patient samples with the B.1.1.7 variant had significantly lower mean Ct value (**Table 1 and Figure 3**) on these instruments. We next tested the hypothesis that other VOC and VOI have significantly lower Ct values. For this analysis, we removed B.1.1.7 samples because their inclusion would confound the data. The data show that B.1.429/B.1.427 samples also had significantly lower Ct values; further analysis found that this signal was attributable to the results for the B.1.429 samples (**Figure 3**). Ct data for the P.2 and R.1 patient samples were also significantly lower (**Figure 3**). Taken together, these observations are consistent with the idea that, on average, several common SARS-CoV-2 variants have significantly lower Ct values, a feature that may make them better able to disseminate and become abundant. The sample sizes for the other VOI and VOIs are not adequate to analyze meaningfully.

## Variant Geospatial Distribution

We next examined the geospatial distribution all VOI and VOC to investigate their extent of distribution in metropolitan Houston. With the exception of the B.1.351, B.1.526.1, B.1.617.1, and B.1.617.2 variants (due to small sample sizes), patients infected with all other variants were dispersed throughout metropolitan Houston, a finding consistent with the propensity of SARS-CoV-2 to spread rapidly between individuals (**Figure 2 and Supplemental Figure 1**).

## E484 Spike Protein Amino Acid Changes and Convergent Evolution

Amino acid replacements at position E484 in spike protein have been of considerable research and public health interest in part because they can decrease the efficacy of SARS-CoV-2 therapeutic antibodies and vaccine- or infection-induced adaptive immunity. We identified 284 samples with changes at E484 (E484K,  $n = 276$ ; E484Q,  $n = 7$ ; and E484D,  $n = 1$ ) that occurred in many genetically diverse SARS-CoV-2 lineages, some of which have not shared a recent common ancestor. For example, we found the E484K polymorphism in samples from 69 patients infected with VOI P.2 and 42 patients with newly described variant R.1.<sup>51-53</sup> R.1 has the following core spike protein amino acid changes: W152L, E484K, D614G, and G769V (<https://outbreak.info/situation-reports?pango=R.1>, last accessed May 17, 2021). Some R.1 variants we identified also contain R21T, L54F, S254P, or P1162L changes. Of note, we identified five patients infected with B.1.1.7 plus the E484K amino acid change, and one patient each infected with B.1.1.7 sample containing either an E484Q or an E484D amino acid change. E484K replacement alters the immunologic profile of SARS-CoV-2,<sup>39, 40, 54-56</sup> and Greaney et al.<sup>57</sup> reported that E484Q reduced viral neutralization for some plasma samples.

## Unexpected Identification of Samples with the B.1.1.7 Variant in Early December 2020

In work conducted contemporaneously with the present study, we have routinely sequenced all genomes from earlier in the pandemic in Houston, including the uptick part of the third wave of disease occurring in November and December 2020 (**Figure 1**). We identified five patients in the first 10 days of December with infections caused by B.1.1.7, an unexpected result because the first Methodist patient previously documented with this VOC was identified in early January 2021,<sup>10</sup> and the first Texas patient was announced by state public health authorities on January 7, 2021 (<https://www.dshs.texas.gov/news/releases/2021/20210107a.aspx>). Thus, our genome data revise this timeline. The first Houston, Texas B.1.1.7 patient was diagnosed in early December 2020, approximately one month earlier than previously known. Based on genome sequences deposited in GISAID ([www.gisaid.org](http://www.gisaid.org), last accessed May 17, 2021) only five B.1.1.7 sequences from the United States were deposited with collection dates before these five Houston B.1.1.7 patients tested positive. Thus, these Houston patients are some of the earliest documented infections caused by the B.1.1.7 VOC in the US, a finding that further highlights the importance of comprehensive genome sequencing of large populations from metropolitan areas with diverse patient populations.

## Discussion

We analyzed the molecular population genomics of SARS-CoV-2 occurring in metropolitan Houston, Texas, with a focus on infections occurring early in 2021, from January 1 through April 30. Our study was based on genome sequences from 11,568 ethnically, socioeconomically, and

geographically diverse patients distributed throughout the metropolitan area. We discovered that infections caused by UK B.1.1.7 increased very rapidly, and at the end of April caused 75-90% of all new cases in Houston. Compared with non-B.1.1.7 patients, individuals infected with B.1.1.7 had significantly lower virus Ct values and a higher rate of hospitalization, but no difference in length of stay or mortality. We also identified seven patients infected with B.1.617-family variants, genotypes now causing extensive disease in India.<sup>43-45</sup>

A key finding from our study was the very rapid trajectory of VOC B.1.1.7 in metropolitan Houston, an area with a population size of approximately 7 million. Several investigators have reported previously that patients infected with the B.1.1.7 VOC have significantly lower Ct values on initial diagnosis, but this has not been a universal finding.<sup>11, 58-63</sup> In the absence of quantitative virus cultures, the Ct value is viewed by many as a convenient proxy for virus load. We found (**Table 1, Figure 3**) a significantly decreased Ct value in nasopharyngeal swabs taken from B.1.1.7 patients compared to non-B.1.1.7 patients, a result consistent with prior reports.<sup>11, 59, 64-66</sup> Our data are consistent with the potential for enhanced transmissibility of B.1.1.7. However, it is clear that there is no uniform relationship between Ct value and ability to disseminate. For example, we identified patients infected with B.1.1.7 who had high Ct values and non-B.1.1.7 patients with low Ct values. Many factors contribute to SARS-CoV-2 transmission dynamics, including but not limited to behavioral characteristics of human populations, percentage of susceptible individuals, vaccination status, network structure, and biologic variation in capacity of virus genotypes to survive and be successfully transmitted. Collectively, our findings stress the need for more information about the relationship between Ct values, quantitative virus cultures, and specific genotypes of SARS-CoV-2.

We identified a significantly increased hospitalization rate for patients with B.1.1.7, compared to non-B.1.1.7 patients, but no significant difference in length of hospitalization or 28-day mortality (**Table 1**). Several studies<sup>23-37</sup> have examined the relationship between disease severity and B.1.1.7. Patone et al.<sup>36</sup> estimated the risk of critical care admission and overall mortality associated with B.1.1.7 compared to the original variant circulating in the UK among very large groups of patients. They reported that patients infected with B.1.1.7 have significantly increased risk for critical care admission and mortality compared to patients not infected with B.1.1.7. However, the risk of mortality was linked to receiving critical care, not distinct virus genotype. They concluded that VOC B.1.1.7 caused more severe disease.

In the UK, at the end of April, the B.1.1.7 variant accounted for 98% of all COVID-19 cases ([https://en.wikipedia.org/wiki/Lineage\\_B.1.1.7](https://en.wikipedia.org/wiki/Lineage_B.1.1.7)).<sup>27</sup> A similar rapid increase in B.1.1.7 and population dominance has been reported in many countries, including Israel, France, Denmark, Norway, Lebanon, Norway, and other countries ([https://en.wikipedia.org/wiki/Lineage\\_B.1.1.7](https://en.wikipedia.org/wiki/Lineage_B.1.1.7)). Our data show that this variant increased rapidly in metropolitan Houston and by the end of April caused 75%-90% of new COVID-19 cases. However, the increase in B.1.1.7 as percent of new cases has occurred in the context of a substantial decrease in total COVID-19 cases in our metropolitan region (**Figure 1**). Although the precise cause of these seemingly disparate trends is unknown, we hypothesize that a relatively successful early vaccination campaign in the region coupled with heightened public awareness and concern about variants contributed to the decreasing case rate, whereas the increase in percent of cases caused by B.1.1.7 is attributed to the capacity of this variant to transmit more rapidly than other variants. We cannot rule out a contribution of a small but significant ability of B.1.1.7 to evade immunity induced by either natural infection or vaccination, and our data are consistent with this idea (**Table 1**). In this

regard, data have been published showing that B.1.1.7 differs in some immunologic characteristics compared to “wild-type” SARS-CoV-2.<sup>67-74</sup>

SARS-CoV-2 variants with the E484K amino acid replacement are of particular concern in many areas including Brazil, South Africa, India and elsewhere

(<https://www.cidrap.umn.edu/news-perspective/2021/02/pfizer-moderna-vaccines-may-be-less-effective-against-b1351-variant>, last accessed: May 17, 2021). Consistent with other studies, we

identified the E484K change in several genetically distinct lineages of the virus, a finding likely due to convergent evolution, as noted previously by others.<sup>39, 40, 54-56, 75</sup> In the U.K., genome

sequencing efforts have identified the E484K change in some B.1.1.7 samples, although it remains a minor subpopulation

([https://assets.publishing.service.gov.uk/government/uploads/system/uploads/attachment\\_data/file/959426/Variant\\_of\\_Concern\\_VOC\\_202012\\_01\\_Technical\\_Briefing\\_5.pdf](https://assets.publishing.service.gov.uk/government/uploads/system/uploads/attachment_data/file/959426/Variant_of_Concern_VOC_202012_01_Technical_Briefing_5.pdf), last accessed May

17, 2021).<sup>76</sup> The B.1.1.7 plus E484K variant has been reported very infrequently elsewhere in the

US (<https://outbreak.info/situation-reports?pango=B.1.1.7&muts=S%3AE484K>, last accessed

May 17, 2021), and consistent with that, we found this amino acid change in only five of the

2,543 B.1.1.7 patients.

The R.1 variant was first reported in Arizona in October 2020, and soon thereafter was identified in Canada and Japan (<https://outbreak.info/situation-reports?pango=R.1>, last accessed

May 17, 2021).<sup>51-53</sup> Cavanaugh et al.<sup>51</sup> recently reported that an R.1 lineage variant was

responsible for a COVID-19 outbreak in a skilled nursing facility in Kentucky in March 2021.

The first Houston Methodist patient with variant R.1 was identified in mid-December 2020 and

its prevalence increased during the study period (**Figure 2**).

Although extensive genomic data are not available, genetically related members of the B.1.617 variant family are thought to be contributing to the massive COVID-19 disease surge in India. In this regard, the identification of patients in the Houston metropolitan area infected with one of the known variants (B.1.617.1) and the closely related B.1.617.2 VOI is disconcerting. One of the patients was diagnosed in mid-March 2021, which makes it one of the earliest documented cases of this variant in the United States with only 11 isolates identified prior to this starting on February 25<sup>th</sup> ([www.gisaid.org](http://www.gisaid.org), last accessed: May 17, 2021). After our study period closed, we identified additional patients with variant B.1.617.1 or B.1.617.2, including some with a very recent travel history outside the US. The B.1.617-family variants have amino acid changes in spike protein that have been linked to increased transmissibility and resistance to antibodies that are generated by natural infection or vaccination, and altered virulence in some studies.<sup>43-45, 47, 48</sup> It will be important to continue to monitor SARS-CoV-2 genomes from patients in the Houston area to determine the rate of spread of these and other related variants, and assess if new variants that arise have biomedically relevant phenotypes.

## Limitations

Our study has several limitations. During the January 1 through April 2021 study period, 253,756 cases of COVID-19 were reported in Harris County and eight contiguous counties ([https://usafactsstatic.blob.core.windows.net/public/data/covid-19/covid\\_confirmed\\_usafacts.csv](https://usafactsstatic.blob.core.windows.net/public/data/covid-19/covid_confirmed_usafacts.csv); last accessed May 11, 2021). Thus, although we have sequenced 94% of all Houston Methodist cases identified during this period, our genome sample represents only 4.6% of all reported cases in the metropolitan region. Our eight hospitals and outpatient clinics are geographic widely dispersed across the metropolitan region and serve

patients who are demographically, socioeconomically, and geographically highly diverse.

However, unless all SARS-CoV-2 genotypes are equally distributed throughout all populations in the Houston metropolitan region, our sample may underrepresent some SARS-CoV-2 genotypes causing COVID-19 in some populations such as homeless and other disenfranchised individuals. Our hospitals and clinics care mainly for adult patients, which means that SARS-CoV-2 variants causing pediatric cases are underrepresented in our study, although overall the number of cases in this age group is relatively small. Finally, virtually all SARS-CoV-2 genomes that we sequenced were obtained from symptomatic patients. Thus, our sample may underrepresent genotypes causing only asymptomatic carriage.

To summarize, by the end of April 2021, 75-90% of all new COVID-19 cases among ethnically, geographically, and socioeconomically diverse Houston Methodist health care patients were caused by the B.1.1.7 variant. Identification of the B.1.617 family of variants and B.1.1.7 plus E484K in metropolitan Houston is cause for concern. Inasmuch as our sample represents only 4.6% of all reported COVID-19 cases in the Houston area, by extrapolation it is reasonable to think that B.1.617-family variants have caused approximately 150 cases in our area. The rate and extent of spread of these variants should be monitored very closely by rapid genome sequence, coupled with linkage to patient metadata., such as disease severity. This is an especially pressing issue for B.1.617-family variants because they are now beginning to become abundant and apparently outcompete B.1.1.7 in many areas of the UK

(<https://outbreak.info/location-reports?loc=GBR>, last accessed May 18, 2021,

<https://www.telegraph.co.uk/global-health/science-and-disease/indian-variant-covid-coronavirus-uk/>, last accessed May 18, 2021)



## **Acknowledgments**

We thank the many talented and dedicated molecular technologists, and volunteers in the Molecular Diagnostics Laboratory and Methodist Research Institute for their dedicated efforts. We are indebted to Drs. Marc Boom and Dirk Sostman for their support, to generous Houston philanthropists for their support and to the Houston Methodist Academic Institute Infectious Diseases Fund that have made this ongoing project possible. James J. Davis and Robert Olson were funded in whole or in part with Federal funds from the National Institute of Allergy and Infectious Diseases, National Institutes of Health, Department of Health and Human Services, under Contract No. 75N93019C00076. We thank Jessica W. Podnar and personnel in the University of Texas Genome Sequencing and Analysis Facility for sequencing some of the genomes in this study. We thank Trina Trinh, Hung-Che Kuo and G. Nguyen for genome sequencing support. We gratefully acknowledge the originating and submitting laboratories of the SARS-CoV-2 genome sequences from GISAID's EpiFlu™ Database used in some of the work presented here. We also thank many colleagues for critical reading of the manuscript and suggesting improvements, and Dr. Sasha Pejerrey, Dr. Kathryn Stockbauer, Adrienne Winston, and Dr. Heather McConnell for help with figures, tables, and editorial contributions.

## **Author Contributions**

J.M.M. conceptualized and designed the project; R.J.O., P.A.C., S.W.L., S.S., R.O., M.N., J.J.D., P.Y., M.O.S, L.P., K.R., M.N.S, R.G, J.C., I.J.F, and J.G. performed research. All authors contributed to writing the manuscript.

Data availability: All genomes have been submitted to GISAID ([www.gisaid.org](http://www.gisaid.org))

**Figure 1.** Epidemiologic curve showing three waves of SARS-CoV-2 infections for Houston Methodist patients. Daily totals are shown as a +/-3-day moving average. The figure was generated with Tableau version 2020.3.4.

**Figure 2.** Cumulative increase in SARS-CoV-2 variants and their distribution in metropolitan Houston. The time frame used is January 1, 2021 through April 30, 2021. The left column shows the cumulative increase in unique patients with each variant. The right column shows the geospatial distribution of these variants based on the home address zip code for each patient. Figures were generated with Tableau version 2020.3.4.

**Figure 3.** Cycle threshold (Ct) for every SARS-CoV-2 patient sample tested using the Abbott Alinity m (panels A – F) or Hologic Panther (panel G – L) assays as described in Materials and Methods. Data are presented as median with 95% Confidence Interval. Mann-Whitney test, \* $P < 0.05$ , \*\* $P < 0.01$ , \*\*\* $P < 0.001$ , \*\*\*\* $P < 0.0001$ .

**Supplemental Figure 1.** Four low-abundance SARS-CoV-2 variants and their geographic distribution in metropolitan Houston.

**Supplemental Figure 2.** Schematic showing structural changes present in spike protein of the major SARS-CoV-2 variants identified in the study, including VOI, VOC, and variant R.1. S1-NTD, S1 domain-aminoterminal domain; S1-RBD, S1 domain-receptor binding domain; S1, S1 domain; S2, S2 domain. The figure is a modified version of one presented in Long et al.<sup>10</sup>

## References

- [1] Huang C, Wang Y, Li X, Ren L, Zhao J, Hu Y, Zhang L, Fan G, Xu J, Gu X, Cheng Z, Yu T, Xia J, Wei Y, Wu W, Xie X, Yin W, Li H, Liu M, Xiao Y, Gao H, Guo L, Xie J, Wang G, Jiang R, Gao Z, Jin Q, Wang J, Cao B: Clinical features of patients infected with 2019 novel coronavirus in Wuhan, China. *Lancet* 2020, 395:497-506. [http://dx.doi.org/10.1016/S0140-6736\(20\)30183-5](http://dx.doi.org/10.1016/S0140-6736(20)30183-5)
- [2] Zhu N, Zhang D, Wang W, Li X, Yang B, Song J, Zhao X, Huang B, Shi W, Lu R, Niu P, Zhan F, Ma X, Wang D, Xu W, Wu G, Gao GF, Tan W, China Novel Coronavirus I, Research T: A Novel Coronavirus from Patients with Pneumonia in China, 2019. *N Engl J Med* 2020, 382:727-33. <http://dx.doi.org/10.1056/NEJMoa2001017>
- [3] Chan JF, Yuan S, Kok KH, To KK, Chu H, Yang J, Xing F, Liu J, Yip CC, Poon RW, Tsoi HW, Lo SK, Chan KH, Poon VK, Chan WM, Ip JD, Cai JP, Cheng VC, Chen H, Hui CK, Yuen KY: A familial cluster of pneumonia associated with the 2019 novel coronavirus indicating person-to-person transmission: a study of a family cluster. *Lancet* 2020, 395:514-23. [http://dx.doi.org/10.1016/S0140-6736\(20\)30154-9](http://dx.doi.org/10.1016/S0140-6736(20)30154-9)
- [4] Wu F, Zhao S, Yu B, Chen YM, Wang W, Song ZG, Hu Y, Tao ZW, Tian JH, Pei YY, Yuan ML, Zhang YL, Dai FH, Liu Y, Wang QM, Zheng JJ, Xu L, Holmes EC, Zhang YZ: A new coronavirus associated with human respiratory disease in China. *Nature* 2020, 579:265-9. <http://dx.doi.org/10.1038/s41586-020-2008-3>
- [5] Coronaviridae Study Group of the International Committee on Taxonomy of V: The species Severe acute respiratory syndrome-related coronavirus: classifying 2019-nCoV and naming it SARS-CoV-2. *Nat Microbiol* 2020, 5:536-44. <http://dx.doi.org/10.1038/s41564-020-0695-z>
- [6] Wang C, Horby PW, Hayden FG, Gao GF: A novel coronavirus outbreak of global health concern. *Lancet* 2020, 395:470-3. [http://dx.doi.org/10.1016/S0140-6736\(20\)30185-9](http://dx.doi.org/10.1016/S0140-6736(20)30185-9)

- [7] Allel K, Tapia-Muñoz T, Morris W: Country-level factors associated with the early spread of COVID-19 cases at 5, 10 and 15 days since the onset. *Global Public Health* 2020, 15:1589-602. <http://dx.doi.org/10.1080/17441692.2020.1814835>
- [8] Long SW, Olsen RJ, Christensen PA, Bernard DW, Davis JR, Shukla M, Nguyen M, Ojeda Saavedra M, Cantu CC, Yerramilli P, Pruitt L, Subedi S, Hendrickson H, Eskandari G, Kumaraswami M, McLellan JS, Musser JM: Molecular Architecture of Early Dissemination and Evolution of the SARS-CoV-2 Virus in Metropolitan Houston, Texas. *bioRxiv* 2020:2020.05.01.072652. <http://dx.doi.org/10.1101/2020.05.01.072652>
- [9] Long SW, Olsen RJ, Christensen PA, Bernard DW, Davis JJ, Shukla M, Nguyen M, Saavedra MO, Yerramilli P, Pruitt L, Subedi S, Kuo HC, Hendrickson H, Eskandari G, Nguyen HAT, Long JH, Kumaraswami M, Goike J, Boutz D, Gollihar J, McLellan JS, Chou CW, Javanmardi K, Finkelstein IJ, Musser JM: Molecular Architecture of Early Dissemination and Massive Second Wave of the SARS-CoV-2 Virus in a Major Metropolitan Area. *MBio* 2020, 11:e02707-20. <http://dx.doi.org/10.1128/mBio.02707-20>
- [10] Long SW, Olsen RJ, Christensen PA, Subedi S, Olson R, Davis JJ, Saavedra MO, Yerramilli P, Pruitt L, Reppond K, Shyer MN, Cambric J, Finkelstein IJ, Gollihar J, Musser JM: Sequence Analysis of 20,453 Severe Acute Respiratory Syndrome Coronavirus 2 Genomes from the Houston Metropolitan Area Identifies the Emergence and Widespread Distribution of Multiple Isolates of All Major Variants of Concern. *The American Journal of Pathology* 2021. <http://dx.doi.org/10.1016/j.ajpath.2021.03.004>
- [11] Musser JM, Olsen RJ, Christensen PA, Long SW, Subedi S, Davis JJ, Gollihar J: Rapid, widespread, and preferential increase of SARS-CoV-2 B.1.1.7 variant in Houston, TX, revealed by 8,857 genome sequences. *medRxiv* 2021:2021.03.16.21253753. <http://dx.doi.org/10.1101/2021.03.16.21253753>
- [12] Long SW, Olsen RJ, Eagar TN, Beres SB, Zhao P, Davis JJ, Brettin T, Xia F, Musser JM: Population Genomic Analysis of 1,777 Extended-Spectrum Beta-Lactamase-Producing *Klebsiella pneumoniae* Isolates, Houston, Texas: Unexpected Abundance of Clonal Group 307. *MBio* 2017, 8. <http://dx.doi.org/10.1128/mBio.00489-17>
- [13] Long SW, Beres SB, Olsen RJ, Musser JM: Absence of patient-to-patient intrahospital transmission of *Staphylococcus aureus* as determined by whole-genome sequencing. *MBio* 2014, 5:e01692-14. <http://dx.doi.org/10.1128/mBio.01692-14>
- [14] Wright AM, Beres SB, Consamus EN, Long SW, Flores AR, Barrios R, Richter GS, Oh SY, Garufi G, Maier H, Drews AL, Stockbauer KE, Cernoch P, Schneewind O, Olsen RJ, Musser JM: Rapidly progressive, fatal, inhalation anthrax-like infection in a human: case report, pathogen genome sequencing, pathology, and coordinated response. *Arch Pathol Lab Med* 2011, 135:1447-59. <http://dx.doi.org/10.5858/2011-0362-SAIR.1>
- [15] Nasser W, Beres SB, Olsen RJ, Dean MA, Rice KA, Long SW, Kristinsson KG, Gottfredsson M, Vuopio J, Raisanen K, Caugant DA, Steinbakk M, Low DE, McGeer A, Darenberg J, Henriques-Normark B, Van Beneden CA, Hoffmann S, Musser JM: Evolutionary pathway to increased virulence and epidemic group A *Streptococcus* disease derived from 3,615 genome sequences. *Proc Natl Acad Sci U S A* 2014, 111:E1768-76. <http://dx.doi.org/10.1073/pnas.1403138111>
- [16] Kachroo P, Eraso JM, Beres SB, Olsen RJ, Zhu L, Nasser W, Bernard PE, Cantu CC, Saavedra MO, Arredondo MJ, Strobe B, Do H, Kumaraswami M, Vuopio J, Grondahl-Yli-Hannuksela K, Kristinsson KG, Gottfredsson M, Pesonen M, Pensar J, Davenport ER, Clark AG, Corander J, Caugant DA, Gaini S, Magnussen MD, Kubiak SL, Nguyen HAT, Long SW, Porter

- AR, DeLeo FR, Musser JM: Integrated analysis of population genomics, transcriptomics and virulence provides novel insights into *Streptococcus pyogenes* pathogenesis. Nat Genet 2019, 51:548-59. <http://dx.doi.org/10.1038/s41588-018-0343-1>
- [17] Korber B, Fischer WM, Gnanakaran S, Yoon H, Theiler J, Abfalterer W, Hengartner N, Giorgi EE, Bhattacharya T, Foley B, Hastie KM, Parker MD, Partridge DG, Evans CM, Freeman TM, de Silva TI, Sheffield C-GG, McDanal C, Perez LG, Tang H, Moon-Walker A, Whelan SP, LaBranche CC, Saphire EO, Montefiori DC: Tracking Changes in SARS-CoV-2 Spike: Evidence that D614G Increases Infectivity of the COVID-19 Virus. Cell 2020, 182:812-27 e19. <http://dx.doi.org/10.1016/j.cell.2020.06.043>
- [18] Plante JA, Liu Y, Liu J, Xia H, Johnson BA, Lokugamage KG, Zhang X, Muruato AE, Zou J, Fontes-Garfias CR, Mirchandani D, Scharton D, Bilello JP, Ku Z, An Z, Kalveram B, Freiberg AN, Menachery VD, Xie X, Plante KS, Weaver SC, Shi PY: Spike mutation D614G alters SARS-CoV-2 fitness. Nature 2021, 592:116-21. <http://dx.doi.org/10.1038/s41586-020-2895-3>
- [19] Daniloski Z, Jordan TX, Ilmain JK, Guo X, Bhabha G, tenOever BR, Sanjana NE: The Spike D614G mutation increases SARS-CoV-2 infection of multiple human cell types. Elife 2021, 10. <http://dx.doi.org/10.7554/eLife.65365>
- [20] Zhang L, Jackson CB, Mou H, Ojha A, Peng H, Quinlan BD, Rangarajan ES, Pan A, Vanderheiden A, Suthar MS, Li W, Izard T, Rader C, Farzan M, Choe H: SARS-CoV-2 spike-protein D614G mutation increases virion spike density and infectivity. Nat Commun 2020, 11:6013. <http://dx.doi.org/10.1038/s41467-020-19808-4>
- [21] Volz E, Hill V, McCrone JT, Price A, Jorgensen D, O'Toole A, Southgate J, Johnson R, Jackson B, Nascimento FF, Rey SM, Nicholls SM, Colquhoun RM, da Silva Filipe A, Shepherd J, Pascall DJ, Shah R, Jesudason N, Li K, Jarrett R, Pacchiarini N, Bull M, Geidelberg L, Siveroni I, Consortium C-U, Goodfellow I, Loman NJ, Pybus OG, Robertson DL, Thomson EC, Rambaut A, Connor TR: Evaluating the Effects of SARS-CoV-2 Spike Mutation D614G on Transmissibility and Pathogenicity. Cell 2021, 184:64-75 e11. <http://dx.doi.org/10.1016/j.cell.2020.11.020>
- [22] Benton DJ, Wrobel AG, Roustan C, Borg A, Xu P, Martin SR, Rosenthal PB, Skehel JJ, Gamblin SJ: The effect of the D614G substitution on the structure of the spike glycoprotein of SARS-CoV-2. Proc Natl Acad Sci U S A 2021, 118. <http://dx.doi.org/10.1073/pnas.2022586118>
- [23] Grubaugh ND, Hodcroft EB, Fauver JR, Phelan AL, Cevik M: Public health actions to control new SARS-CoV-2 variants. Cell 2021, 184:1127-32. <http://dx.doi.org/10.1016/j.cell.2021.01.044>
- [24] Walensky RP, Walke HT, Fauci AS: SARS-CoV-2 Variants of Concern in the United States-Challenges and Opportunities. JAMA 2021, 325:1037-8. <http://dx.doi.org/10.1001/jama.2021.2294>
- [25] Mascola JR, Graham BS, Fauci AS: SARS-CoV-2 Viral Variants-Tackling a Moving Target. JAMA 2021, 325:1261-2. <http://dx.doi.org/10.1001/jama.2021.2088>
- [26] Davies NG, Abbott S, Barnard RC, Jarvis CI, Kucharski AJ, Munday JD, Pearson CAB, Russell TW, Tully DC, Washburne AD, Wenseleers T, Gimma A, Waites W, Wong KLM, van Zandvoort K, Silverman JD, Group CC-W, Consortium C-GU, Diaz-Ordaz K, Keogh R, Eggo RM, Funk S, Jit M, Atkins KE, Edmunds WJ: Estimated transmissibility and impact of SARS-CoV-2 lineage B.1.1.7 in England. Science 2021, 372:2020.12.24.20248822. <http://dx.doi.org/10.1126/science.abg3055>
- [27] Davies NG, Abbott S, Barnard RC, Jarvis CI, Kucharski AJ, Munday JD, Pearson CAB, Russell TW, Tully DC, Washburne AD, Wenseleers T, Gimma A, Waites W, Wong KLM, van

- Zandvoort K, Silverman JD, Group CC-W, Consortium C-GU, Diaz-Ordaz K, Keogh R, Eggo RM, Funk S, Jit M, Atkins KE, Edmunds WJ: Estimated transmissibility and impact of SARS-CoV-2 lineage B.1.1.7 in England. *Science* 2021, 372. <http://dx.doi.org/10.1126/science.abg3055>
- [28] Volz E, Mishra S, Chand M, Barrett JC, Johnson R, Geidelberg L, Hinsley WR, Laydon DJ, Dabrera G, O'Toole A, Amato R, Ragonnet-Cronin M, Harrison I, Jackson B, Ariani CV, Boyd O, Loman NJ, McCrone JT, Gonçalves S, Jorgensen D, Myers R, Hill V, Jackson DK, Gaythorpe K, Groves N, Sillitoe J, Kwiatkowski DP, Flaxman S, Ratmann O, Bhatt S, Hopkins S, Gandy A, Rambaut A, Ferguson NM: Transmission of SARS-CoV-2 Lineage B.1.1.7 in England: Insights from linking epidemiological and genetic data. *medRxiv* 2021:2020.12.30.20249034. <http://dx.doi.org/10.1101/2020.12.30.20249034>
- [29] Graham MS, Sudre CH, May A, Antonelli M, Murray B, Varsavsky T, Kläser K, Canas LS, Molteni E, Modat M, Drew DA, Nguyen LH, Polidori L, Selvachandran S, Hu C, Capdevila J, Hammers A, Chan AT, Wolf J, Spector TD, Steves CJ, Ourselin S: Changes in symptomatology, re-infection and transmissibility associated with SARS-CoV-2 variant B.1.1.7: an ecological study. *medRxiv* 2021:2021.01.28.21250680. <http://dx.doi.org/10.1101/2021.01.28.21250680>
- [30] Challen R, Brooks-Pollock E, Read JM, Dyson L, Tsaneva-Atanasova K, Danon L: Risk of mortality in patients infected with SARS-CoV-2 variant of concern 202012/1: matched cohort study. *BMJ* 2021, 372:n579. <http://dx.doi.org/10.1136/bmj.n579>
- [31] Lumley SF, Rodger G, Constantinides B, Sanderson N, Chau KK, Street TL, O'Donnell D, Howarth A, Hatch SB, Marsden BD, Cox S, James T, Warren F, Peck LJ, Ritter TG, de Toledo Z, Warren L, Axten D, Cornall RJ, Jones EY, Stuart DI, Screaton G, Ebner D, Hoosdally S, Chand M, Crook DW, O'Donnell A-M, Conlon CP, Pouwels KB, Walker AS, Peto TEA, Hopkins S, Walker TM, Stoesser NE, Matthews PC, Jeffery K, Eyre DW: An observational cohort study on the incidence of SARS-CoV-2 infection and B.1.1.7 variant infection in healthcare workers by antibody and vaccination status. *medRxiv* 2021:2021.03.09.21253218. <http://dx.doi.org/10.1101/2021.03.09.21253218>
- [32] Washington NL, Gangavarapu K, Zeller M, Bolze A, Cirulli ET, Schiabor Barrett KM, Larsen BB, Anderson C, White S, Cassens T, Jacobs S, Levan G, Nguyen J, Ramirez JM, 3rd, Rivera-Garcia C, Sandoval E, Wang X, Wong D, Spencer E, Robles-Sikisaka R, Kurzban E, Hughes LD, Deng X, Wang C, Servellita V, Valentine H, De Hoff P, Seaver P, Sathe S, Gietzen K, Sickler B, Antico J, Hoon K, Liu J, Harding A, Bakhtar O, Basler T, Austin B, MacCannell D, Isaksson M, Febbo PG, Becker D, Laurent M, McDonald E, Yeo GW, Knight R, Laurent LC, de Feo E, Worobey M, Chiu CY, Suchard MA, Lu JT, Lee W, Andersen KG: Emergence and rapid transmission of SARS-CoV-2 B.1.1.7 in the United States. *Cell* 2021, 184:2587-94 e7. <http://dx.doi.org/10.1016/j.cell.2021.03.052>
- [33] Stephen M. Kissler JRF, Christina Mack, Caroline G. Tai, Mallery I., Breban AEW, Radhika M. Samant, Deverick J. Anderson, David D. Ho, Nathan, D. Grubaugh YHG: Densely sampled viral trajectories suggest longer duration of acute infection with B.1.1.7 variant relative to non-B.1.1.7 SARS-CoV-2. *DASH Preprint*.
- [34] Galloway SE, Paul P, MacCannell DR, Johansson MA, Brooks JT, MacNeil A, Slayton RB, Tong S, Silk BJ, Armstrong GL, Biggerstaff M, Dugan VG: Emergence of SARS-CoV-2 B.1.1.7 Lineage - United States, December 29, 2020-January 12, 2021. *MMWR Morb Mortal Wkly Rep* 2021, 70:95-9. <http://dx.doi.org/10.15585/mmwr.mm7003e2>
- [35] Alpert T, Lasek-Nesselquist E, Brito AF, Valesano AL, Rothman J, MacKay MJ, Petrone ME, Breban MI, Watkins AE, Vogels CBF, Russell A, Kelly JP, Shudt M, Plitnick J, Schneider E, Fitzsimmons WJ, Khullar G, Metti J, Dudley JT, Nash M, Wang J, Liu C, Hui P, Muyombwe



- A, Downing R, Razeq J, Bart SM, Murphy S, Neal C, Laszlo E, Landry ML, Cook PW, Fauver JR, Mason CE, Lauring AS, St George K, MacCannell DR, Grubaugh ND: Early introductions and community transmission of SARS-CoV-2 variant B.1.1.7 in the United States. medRxiv 2021:2021.02.10.21251540. <http://dx.doi.org/10.1101/2021.02.10.21251540>
- [36] Patone M, Thomas K, Hatch R, Tan PS, Coupland C, Liao W, Mouncey P, Harrison D, Rowan K, Horby P, Watkinson P, Hippisley-Cox J: Analysis of severe outcomes associated with the SARS-CoV-2 Variant of Concern 202012/01 in England using ICNARC Case Mix Programme and QResearch databases. medRxiv 2021:2021.03.11.21253364. <http://dx.doi.org/10.1101/2021.03.11.21253364>
- [37] Piantham C, Ito K: Estimating the increased transmissibility of the B.1.1.7 strain over previously circulating strains in England using frequencies of GISAID sequences and the distribution of serial intervals. medRxiv 2021:2021.03.17.21253775. <http://dx.doi.org/10.1101/2021.03.17.21253775>
- [38] Naveca F, Nascimento V, Souza V, Corado A, Nascimento F, Silva G, Costa Á, Duarte D, Pessoa K, Gonçalves L, Brandão MJ, Jesus M, Fernandes C, Pinto R, Silva M, Mattos T, Wallau GL, Siqueira MM, Resende PC, Delatorre E, Gräf T, Bello G: Phylogenetic relationship of SARS-CoV-2 sequences from Amazonas with emerging Brazilian variants harboring mutations E484K and N501Y in the Spike protein. virological.org 2021. <https://virological.org/t/phylogenetic-relationship-of-sars-cov-2-sequences-from-amazonas-with-emerging-brazilian-variants-harboring-mutations-e484k-and-n501y-in-the-spike-protein/585>  
Last accessed: Feb 19, 2021.
- [39] Voloch CM, Silva F Rd, de Almeida LGP, Cardoso CC, Brustolini OJ, Gerber AL, Guimarães APdC, Mariani D, Costa RMd, Ferreira OC, Cavalcanti AC, Frauches TS, de Mello CMB, Galliez RM, Faffe DS, Castiñeiras TMPP, Tanuri A, de Vasconcelos ATR: Genomic characterization of a novel SARS-CoV-2 lineage from Rio de Janeiro, Brazil. medRxiv 2020:2020.12.23.20248598. <http://dx.doi.org/10.1101/2020.12.23.20248598>
- [40] Tegally H, Wilkinson E, Giovanetti M, Iranzadeh A, Fonseca V, Giandhari J, Doolabh D, Pillay S, San EJ, Msomi N, Mlisana K, von Gottberg A, Walaza S, Allam M, Ismail A, Mohale T, Glass AJ, Engelbrecht S, Van Zyl G, Preiser W, Petruccione F, Sigal A, Hardie D, Marais G, Hsiao M, Korsman S, Davies M-A, Tyers L, Mudau I, York D, Maslo C, Goedhals D, Abrahams S, Laguda-Akingba O, Alisoltani-Dehkordi A, Godzik A, Wibmer CK, Sewell BT, Lourenço J, Alcantara LCJ, Pond SLK, Weaver S, Martin D, Lessells RJ, Bhiman JN, Williamson C, de Oliveira T: Emergence and rapid spread of a new severe acute respiratory syndrome-related coronavirus 2 (SARS-CoV-2) lineage with multiple spike mutations in South Africa. medRxiv 2020:2020.12.21.20248640. <http://dx.doi.org/10.1101/2020.12.21.20248640>
- [41] Bradshaw D, Laubscher R, Dorrington R, Groenewald P, Moultrie T: Report on Weekly Deaths in South Africa: 1 January-8 December 2020 (Week 49). samrc.ac.za 2020. <https://www.samrc.ac.za/sites/default/files/files/2020-07-29/WeeklyDeaths21July2020.pdf> Last accessed: Feb 18, 2021.
- [42] Zhang W, Davis BD, Chen SS, Sincuir Martinez JM, Plummer JT, Vail E: Emergence of a Novel SARS-CoV-2 Variant in Southern California. JAMA 2021, 325:1324-6. <http://dx.doi.org/10.1001/jama.2021.1612>
- [43] Cherian S, Potdar V, Jadhav S, Yadav P, Gupta N, Das M, Rakshit P, Singh S, Abraham P, Panda S: Convergent evolution of SARS-CoV-2 spike mutations, L452R, E484Q and P681R, in the second wave of COVID-19 in Maharashtra, India. bioRxiv 2021:2021.04.22.440932. <http://dx.doi.org/10.1101/2021.04.22.440932>

- [44] Yadav PD, Sapkal GN, Abraham P, Ella R, Deshpande G, Patil DY, Nyayanit DA, Gupta N, Sahay RR, Shete AM, Panda S, Bhargava B, Mohan VK: Neutralization of variant under investigation B.1.617 with sera of BBV152 vaccinees. *Clin Infect Dis* 2021:2021.04.23.441101. <http://dx.doi.org/10.1093/cid/ciab411>
- [45] Yadav PD, Mohandas S, Shete AM, Nyayanit DA, Gupta N, Patil DY, Sapkal GN, Potdar V, Kadam M, Kumar A, Kumar S, Suryavanshi D, Mote CS, Abraham P, Panda S, Bhargava B: SARS CoV-2 variant B.1.617.1 is highly pathogenic in hamsters than B.1 variant. *bioRxiv* 2021:2021.05.05.442760. <http://dx.doi.org/10.1101/2021.05.05.442760>
- [46] Hoffmann M, Hofmann-Winkler H, Krüger N, Kempf A, Nehlmeier I, Graichen L, Sidorovich A, Moldenhauer A-S, Winkler MS, Schulz S, Jäck H-M, Stankov MV, Behrens GMN, Pöhlmann S: SARS-CoV-2 variant B.1.617 is resistant to Bamlanivimab and evades antibodies induced by infection and vaccination. *bioRxiv* 2021:2021.05.04.442663. <http://dx.doi.org/10.1101/2021.05.04.442663>
- [47] Ferreira I, Datir R, Papa G, Kemp S, Meng B, Rakshit P, Singh S, Pandey R, Ponnusamy K, Radhakrishnan VS, Sato K, James L, Aggarwal A, Gupta RK: SARS-CoV-2 B.1.617 emergence and sensitivity to vaccine-elicited antibodies. *bioRxiv* 2021:2021.05.08.443253. <http://dx.doi.org/10.1101/2021.05.08.443253>
- [48] Deng X, Garcia-Knight MA, Khalid MM, Servellita V, Wang C, Morris MK, Sotomayor-González A, Glasner DR, Reyes KR, Gliwa AS, Reddy NP, Sanchez San Martin C, Federman S, Cheng J, Balcerek J, Taylor J, Streithorst JA, Miller S, Sreekumar B, Chen PY, Schulze-Gahmen U, Taha TY, Hayashi JM, Simoneau CR, Kumar GR, McMahon S, Lidsky PV, Xiao Y, Hemarajata P, Green NM, Espinosa A, Kath C, Haw M, Bell J, Hacker JK, Hanson C, Wadford DA, Anaya C, Ferguson D, Frankino PA, Shivram H, Lareau LF, Wyman SK, Ott M, Andino R, Chiu CY: Transmission, infectivity, and neutralization of a spike L452R SARS-CoV-2 variant. *Cell* 2021. <http://dx.doi.org/10.1016/j.cell.2021.04.025>
- [49] Tandel D, Gupta D, Sah V, Harinivas Harshan K: N440K variant of SARS-CoV-2 has Higher Infectious Fitness. *bioRxiv* 2021:2021.04.30.441434. <http://dx.doi.org/10.1101/2021.04.30.441434>
- [50] Rani PR, Imran M, Lakshmi JV, Jolly B, Jain A, Surekha A, Senthivel V, Chandrasekhar P, Divakar MK, Srinivasulu D, Bhojar RC, Vanaja PR, Scaria V, Sivasubbu S: Symptomatic reinfection of SARS-CoV-2 with spike protein variant N440K associated with immune escape. *J Med Virol* 2021, n/a. <http://dx.doi.org/10.1002/jmv.26997>
- [51] Cavanaugh AM, Fortier S, Lewis P, Arora V, Johnson M, George K, Tobias J, Lunn S, Miller T, Thoroughman D, Spicer KB: COVID-19 Outbreak Associated with a SARS-CoV-2 R.1 Lineage Variant in a Skilled Nursing Facility After Vaccination Program - Kentucky, March 2021. *MMWR Morb Mortal Wkly Rep* 2021, 70:639-43. <http://dx.doi.org/10.15585/mmwr.mm7017e2>
- [52] Hirotsu Y, Omata M: Household transmission of SARS-CoV-2 R.1 lineage with spike E484K mutation in Japan. *medRxiv* 2021. <http://dx.doi.org/10.1101/2021.03.16.21253248>
- [53] Tokumasu R, Weeraratne D, Snowdon J, Parida L, Kudo M, Koyama T: Introductions and evolutions of SARS-CoV-2 strains in Japan. *medRxiv* 2021. <http://dx.doi.org/10.1101/2021.02.26.21252555>
- [54] Liu Z, VanBlargan LA, Bloyet LM, Rothlauf PW, Chen RE, Stumpf S, Zhao H, Errico JM, Theel ES, Liebeskind MJ, Alford B, Buchser WJ, Ellebedy AH, Fremont DH, Diamond MS, Whelan SPJ: Identification of SARS-CoV-2 spike mutations that attenuate monoclonal and



serum antibody neutralization. *Cell host & microbe* 2021, 29:477-88 e4.

<http://dx.doi.org/10.1016/j.chom.2021.01.014>

[55] Liu H, Wei P, Zhang Q, Chen Z, Aviszus K, Downing W, Peterson S, Reynoso L, Downey GP, Frankel SK, Kappler J, Marrack P, Zhang G: 501Y.V2 and 501Y.V3 variants of SARS-CoV-2 lose binding to Bamlanivimab in vitro. *bioRxiv* 2021.

<http://dx.doi.org/10.1101/2021.02.16.431305>

[56] Zhou D, Dejnirattisai W, Supasa P, Liu C, Mentzer AJ, Ginn HM, Zhao Y, Duyvesteyn HME, Tuekprakhon A, Nutalai R, Wang B, Paesen GC, Lopez-Camacho C, Slon-Campos J, Hallis B, Coombes N, Bewley K, Charlton S, Walter TS, Skelly D, Lumley SF, Dold C, Levin R, Dong T, Pollard AJ, Knight JC, Crook D, Lambe T, Clutterbuck E, Bibi S, Flaxman A, Bittaye M, Belij-Rammerstorfer S, Gilbert S, James W, Carroll MW, Klenerman P, Barnes E, Dunachie SJ, Fry EE, Mongkolsapaya J, Ren J, Stuart DI, Screaton GR: Evidence of escape of SARS-CoV-2 variant B.1.351 from natural and vaccine-induced sera. *Cell* 2021, 184:2348-61 e6.

<http://dx.doi.org/10.1016/j.cell.2021.02.037>

[57] Greaney AJ, Loes AN, Crawford KHD, Starr TN, Malone KD, Chu HY, Bloom JD: Comprehensive mapping of mutations in the SARS-CoV-2 receptor-binding domain that affect recognition by polyclonal human plasma antibodies. *Cell host & microbe* 2021, 29:463-76 e6.

<http://dx.doi.org/10.1016/j.chom.2021.02.003>

[58] Falush D, Wirth T, Linz B, Pritchard JK, Stephens M, Kidd M, Blaser MJ, Graham DY, Vacher S, Perez-Perez GI, Yamaoka Y, Megraud F, Otto K, Reichard U, Katzowitsch E, Wang X, Achtman M, Suerbaum S: Traces of human migrations in *Helicobacter pylori* populations. *Science* 2003, 299:1582-5. <http://dx.doi.org/10.1126/science.1080857>

[59] Golubchik T, Lythgoe KA, Hall M, Ferretti L, Fryer HR, MacIntyre-Cockett G, de Cesare M, Trebes A, Piazza P, Buck D, Todd JA, Fraser C, Bonsall D: Early analysis of a potential link between viral load and the N501Y mutation in the SARS-COV-2 spike protein. *medRxiv* 2021:2021.01.12.20249080. <http://dx.doi.org/10.1101/2021.01.12.20249080>

[60] Walker AS, Vihta K-D, Gethings O, Pritchard E, Jones J, House T, Bell I, Bell JI, Newton JN, Farrar J, Diamond I, Studley R, Rourke E, Hay J, Hopkins S, Crook D, Peto T, Matthews PC, Eyre DW, Stoesser N, Pouwels KB: Increased infections, but not viral burden, with a new SARS-CoV-2 variant. *medRxiv* 2021:2021.01.13.21249721.

<http://dx.doi.org/10.1101/2021.01.13.21249721>

[61] Alizon S, Selinger C, Sofonea MT, Haim-Boukobza S, Giannoli J-M, Ninove L, Pillet S, Vincent T, de Rougemont A, Tumiotto C, Solis M, Stephan R, Bressollette-Bodin C, Salmona M, L'Honneur A-S, Behillil S, Lefeuvre C, Dina J, Hantz S, Hartard C, Veyer D, Delagrèverie HM, Fourati S, Visseaux B, Henquell C, Lina B, Foulongne V, Burrel S: Epidemiological and clinical insights from SARS-CoV-2 RT-PCR cycle amplification values. *medRxiv* 2021:2021.03.15.21253653. <http://dx.doi.org/10.1101/2021.03.15.21253653>

[62] Hay JA, Kennedy-Shaffer L, Kanjilal S, Lennon NJ, Gabriel SB, Lipsitch M, Mina MJ: Estimating epidemiologic dynamics from cross-sectional viral load distributions. *medRxiv* 2021:2020.10.08.20204222. <http://dx.doi.org/10.1101/2020.10.08.20204222>

[63] Ratcliff J, Nguyen D, Fish M, Rhyne J, Jennings A, Williams S, Al-Beidh F, Bonsall D, Evans A, Golubchik T, Gordon AC, Lamikanra A, Tsang P, Ciccone N, Leuscher U, Slack W, Laing E, Mouncey PR, Ziyenge S, Olivera M, Ploeg R, Rowan KM, Shankar-Hari M, Roberts DJ, Menon DK, Estcourt L, Simmonds P, Harvala H: Virological and serological characterization of critically ill patients with COVID-19 in the UK: a special focus on variant detection. *medRxiv* 2021:2021.02.24.21251989. <http://dx.doi.org/10.1101/2021.02.24.21251989>

- [64] Frampton D, Rampling T, Cross A, Bailey H, Heaney J, Byott M, Scott R, Sconza R, Price J, Margaritis M, Bergstrom M, Spyer MJ, Miralhes PB, Grant P, Kirk S, Valerio C, Mangera Z, Prabhakar T, Moreno-Cuesta J, Arulkumaran N, Singer M, Shin GY, Sanchez E, Paraskevopoulou SM, Pillay D, McKendry RA, Mirfenderesky M, Houlihan CF, Nastouli E: Genomic characteristics and clinical effect of the emergent SARS-CoV-2 B.1.1.7 lineage in London, UK: a whole-genome sequencing and hospital-based cohort study. *Lancet Infect Dis* 2021. [http://dx.doi.org/10.1016/S1473-3099\(21\)00170-5](http://dx.doi.org/10.1016/S1473-3099(21)00170-5)
- [65] Lyngse FP, Mølbak K, Skov RL, Christiansen LE, Mortensen LH, Albertsen M, Møller CH, Krause TG, Rasmussen M, Michaelsen TY, Voldstedlund M, Fonager J, Steenhard N, Kirkeby C: Increased Transmissibility of SARS-CoV-2 Lineage B.1.1.7 by Age and Viral Load: Evidence from Danish Households. *medRxiv* 2021:2021.04.16.21255459. <http://dx.doi.org/10.1101/2021.04.16.21255459>
- [66] Kidd M, Richter A, Best A, Cumley N, Mirza J, Percival B, Mayhew M, Megram O, Ashford F, White T, Moles-Garcia E, Crawford L, Bosworth A, Atabani SF, Plant T, McNally A: S-variant SARS-CoV-2 lineage B1.1.7 is associated with significantly higher viral loads in samples tested by ThermoFisher TaqPath RT-qPCR. *J Infect Dis* 2021. <http://dx.doi.org/10.1093/infdis/jiab082>
- [67] Supasa P, Zhou D, Dejnirattisai W, Liu C, Mentzer AJ, Ginn HM, Zhao Y, Duyvesteyn HME, Nutalai R, Tuekprakhon A, Wang B, Paesen GC, Slon-Campos J, Lopez-Camacho C, Hallis B, Coombes N, Bewley KR, Charlton S, Walter TS, Barnes E, Dunachie SJ, Skelly D, Lumley SF, Baker N, Shaik I, Humphries HE, Godwin K, Gent N, Sienkiewicz A, Dold C, Levin R, Dong T, Pollard AJ, Knight JC, Klenerman P, Crook D, Lambe T, Clutterbuck E, Bibi S, Flaxman A, Bittaye M, Belij-Rammerstorfer S, Gilbert S, Hall DR, Williams MA, Paterson NG, James W, Carroll MW, Fry EE, Mongkolsapaya J, Ren J, Stuart DI, Screaton GR: Reduced neutralization of SARS-CoV-2 B.1.1.7 variant by convalescent and vaccine sera. *Cell* 2021, 184:2201-11 e7. <http://dx.doi.org/10.1016/j.cell.2021.02.033>
- [68] Emary KRW, Golubchik T, Aley PK, Ariani CV, Angus B, Bibi S, Blane B, Bonsall D, Cicconi P, Charlton S, Clutterbuck EA, Collins AM, Cox T, Darton TC, Dold C, Douglas AD, Duncan CJA, Ewer KJ, Flaxman AL, Faust SN, Ferreira DM, Feng S, Finn A, Folegatti PM, Fuskova M, Galiza E, Goodman AL, Green CM, Green CA, Greenland M, Hallis B, Heath PT, Hay J, Hill HC, Jenkin D, Kerridge S, Lazarus R, Libri V, Lillie PJ, Ludden C, Marchevsky NG, Minassian AM, McGregor AC, Mujadidi YF, Phillips DJ, Plested E, Pollock KM, Robinson H, Smith A, Song R, Snape MD, Sutherland RK, Thomson EC, Toshner M, Turner DPJ, Vekemans J, Villafana TL, Williams CJ, Hill AVS, Lambe T, Gilbert SC, Voysey M, Ramasamy MN, Pollard AJ, consortium C-GU, Project A, Oxford C-VTG: Efficacy of ChAdOx1 nCoV-19 (AZD1222) vaccine against SARS-CoV-2 variant of concern 202012/01 (B.1.1.7): an exploratory analysis of a randomised controlled trial. *Lancet* 2021, 397:1351-62. [http://dx.doi.org/10.1016/S0140-6736\(21\)00628-0](http://dx.doi.org/10.1016/S0140-6736(21)00628-0)
- [69] Collier DA, De Marco A, Ferreira I, Meng B, Datir RP, Walls AC, Kemp SA, Bassi J, Pinto D, Silacci-Fregni C, Bianchi S, Tortorici MA, Bowen J, Culp K, Jaconi S, Cameroni E, Snell G, Pizzuto MS, Pellanda AF, Garzoni C, Riva A, Collaboration C-NBC-, Elmer A, Kingston N, Graves B, McCoy LE, Smith KGC, Bradley JR, Temperton N, Ceron-Gutierrez L, Barcenas-Morales G, Consortium C-GU, Harvey W, Virgin HW, Lanzavecchia A, Piccoli L, Doffinger R, Wills M, Veesler D, Corti D, Gupta RK: Sensitivity of SARS-CoV-2 B.1.1.7 to mRNA vaccine-elicited antibodies. *Nature* 2021, 593:136-41. <http://dx.doi.org/10.1038/s41586-021-03412-7>

- [70] Muik A, Wallisch AK, Sanger B, Swanson KA, Muhl J, Chen W, Cai H, Maurus D, Sarkar R, Tureci O, Dormitzer PR, Sahin U: Neutralization of SARS-CoV-2 lineage B.1.1.7 pseudovirus by BNT162b2 vaccine-elicited human sera. *Science* 2021, 371:1152-3. <http://dx.doi.org/10.1126/science.abg6105>
- [71] Mahase E: Covid-19: Where are we on vaccines and variants? *BMJ* 2021, 372:n597. <http://dx.doi.org/10.1136/bmj.n597>
- [72] Wang P, Nair MS, Liu L, Iketani S, Luo Y, Guo Y, Wang M, Yu J, Zhang B, Kwong PD, Graham BS, Mascola JR, Chang JY, Yin MT, Sobieszczyk M, Kyratsous CA, Shapiro L, Sheng Z, Huang Y, Ho DD: Increased Resistance of SARS-CoV-2 Variants B.1.351 and B.1.1.7 to Antibody Neutralization. *bioRxiv* 2021. <http://dx.doi.org/10.1101/2021.01.25.428137>
- [73] Edara VV, Hudson WH, Xie X, Ahmed R, Suthar MS: Neutralizing Antibodies Against SARS-CoV-2 Variants After Infection and Vaccination. *JAMA* 2021, 325:1896-8. <http://dx.doi.org/10.1001/jama.2021.4388>
- [74] Wu K, Werner AP, Moliva JI, Koch M, Choi A, Stewart-Jones GBE, Bennett H, Boyoglu-Barnum S, Shi W, Graham BS, Carfi A, Corbett KS, Seder RA, Edwards DK: mRNA-1273 vaccine induces neutralizing antibodies against spike mutants from global SARS-CoV-2 variants. *bioRxiv* 2021:2021.01.25.427948. <http://dx.doi.org/10.1101/2021.01.25.427948>
- [75] Altmann DM, Boyton RJ, Beale R: Immunity to SARS-CoV-2 variants of concern. *Science* 2021, 371:1103-4. <http://dx.doi.org/10.1126/science.abg7404>
- [76] Wise J: Covid-19: The E484K mutation and the risks it poses. *BMJ* 2021, 372:n359. <http://dx.doi.org/10.1136/bmj.n359>

**Table 1. Summary of pertinent patient metadata for the 11,568 unique patients**

|                                   | <b>B.1.1.7 Variant</b> | <b>Other Variants</b> | <b>Total</b>  | <b>Statistical Analysis</b>         |
|-----------------------------------|------------------------|-----------------------|---------------|-------------------------------------|
| <b>No. (%) with data</b>          | 2543 (22.0%)           | 9025 (78.0%)          | 11568         |                                     |
| <b>Patient Characteristics</b>    |                        |                       |               |                                     |
| Median Age (Years)                | 50.0                   | 54.0                  |               | $P < 0.0001$<br>Mann-Whitney        |
| Female                            | 1351 (53.1%)           | 4778 (52.9%)          | 6129 (53.0%)  | $P = 0.8749$<br>Fisher's exact test |
| Male                              | 1192 (46.9%)           | 4247 (47.1%)          | 5439 (47.0%)  |                                     |
| <b>Ethnicity</b>                  |                        |                       |               |                                     |
| Caucasian                         | 984 (39.0%)            | 3666 (40.8%)          | 4650 (40.4%)  | $P < 0.0001$<br>Chi-square          |
| Hispanic or Latino                | 741 (29.4%)            | 2656 (29.6%)          | 3397 (29.5%)  |                                     |
| Black                             | 581 (23.0%)            | 1606 (17.9%)          | 2187 (19.0%)  |                                     |
| Asian                             | 116 (4.6%)             | 533 (5.9%)            | 649 (5.6%)    |                                     |
| Native American                   | 12 (0.5%)              | 27 (0.3%)             | 39 (0.3%)     |                                     |
| Hawaiian/Pacific Islander         | 3 (0.1%)               | 23 (0.3%)             | 26 (0.2%)     |                                     |
| Unavailable                       | 86 (3.4%)              | 475 (5.3%)            | 561 (4.9%)    |                                     |
| <b>BMI</b>                        |                        |                       |               |                                     |
| Median BMI                        | 30.4                   | 29.5                  | n=(10164)     | $P < 0.0001$<br>Mann-Whitney        |
| <18.5                             | 32 (1.3%)              | 141 (1.6%)            | 173 (1.5%)    | $P < 0.0001$<br>Chi-square          |
| 18.5-25                           | 402 (15.8%)            | 1570 (17.4%)          | 1972 (17.0%)  |                                     |
| 25-30                             | 655 (25.8%)            | 2455 (27.2%)          | 3110 (26.9%)  |                                     |
| 30-35                             | 567 (22.3%)            | 1810 (20.1%)          | 2377 (20.5%)  |                                     |
| >=35                              | 632 (24.9%)            | 1900 (21.1%)          | 2532 (21.9%)  |                                     |
| Unknown                           | 255 (10.0%)            | 1149 (12.7%)          | 1404 (12.1%)  |                                     |
| <b>Admission Data</b>             |                        |                       |               |                                     |
| Admitted                          | 1350 (53.1%)           | 4184 (46.4%)          | 5534 (47.8%)  | $P < 0.0001$<br>Fisher's exact test |
| Not Admitted                      | 1193 (46.9%)           | 4841 (53.6%)          | 6034 (52.2%)  |                                     |
| Median LOS (Days)                 | 5.1                    | 5.2                   |               | $P = 0.9964$<br>Mann-Whitney        |
| <b>Max Respiratory Support</b>    |                        |                       |               |                                     |
| ECMO                              | 8 (0.6%)               | 17 (0.4%)             | 25 (0.5%)     | $P = 0.0074$<br>Chi-square          |
| Mechanical Ventilation            | 116 (8.6%)             | 362 (8.7%)            | 478 (8.6%)    |                                     |
| Non-Invasive Ventilation          | 120 (8.9%)             | 434 (10.4%)           | 554 (10.0%)   |                                     |
| High Flow Oxygen                  | 277 (20.5%)            | 680 (16.3%)           | 957 (17.3%)   |                                     |
| Low Flow Oxygen                   | 568 (42.1%)            | 1802 (43.1%)          | 2370 (42.8%)  |                                     |
| Room Air                          | 261 (19.3%)            | 889 (21.2%)           | 1150 (20.8%)  |                                     |
| <b>Mortality</b>                  |                        |                       |               |                                     |
| Alive                             | 2430 (95.6%)           | 8607 (95.4%)          | 11037 (95.4%) | $P = 0.7475$<br>Fisher's exact test |
| Deceased                          | 113 (4.4%)             | 418 (4.6%)            | 531 (4.6%)    |                                     |
| <b>Median PCR Cycle Threshold</b> |                        |                       |               |                                     |
| Abbott Alinity                    | 23.4<br>n=(899)        | 26.8<br>n=(3272)      | n=(4171)      | $P < 0.0001$<br>Mann-Whitney        |
| Hologic Panther                   | 24.5<br>n=(300)        | 26.2<br>n=(1538)      | n=(1838)      | $P = 0.0109$<br>Mann-Whitney        |
| <b>Vaccine</b>                    |                        |                       |               |                                     |
| No vaccine                        | 2358 (92.7%)           | 8556 (94.8%)          | 10914 (94.3%) | $P < 0.0001$<br>Chi-square          |
| >7 days past 1st Vaccine          | 107 (4.2%)             | 396 (4.4%)            | 503 (4.3%)    |                                     |
| >14 days past 2nd Vaccine         | 78 (3.1%)              | 73 (0.8%)             | 151 (1.3%)    |                                     |

Data include 11568 unique patients with high-quality sequence results between January 1, 2021, and April 30, 2021. CI: confidence interval; ECMO: extracorporeal membrane oxygenation; LOS: length of stay

Figure 1

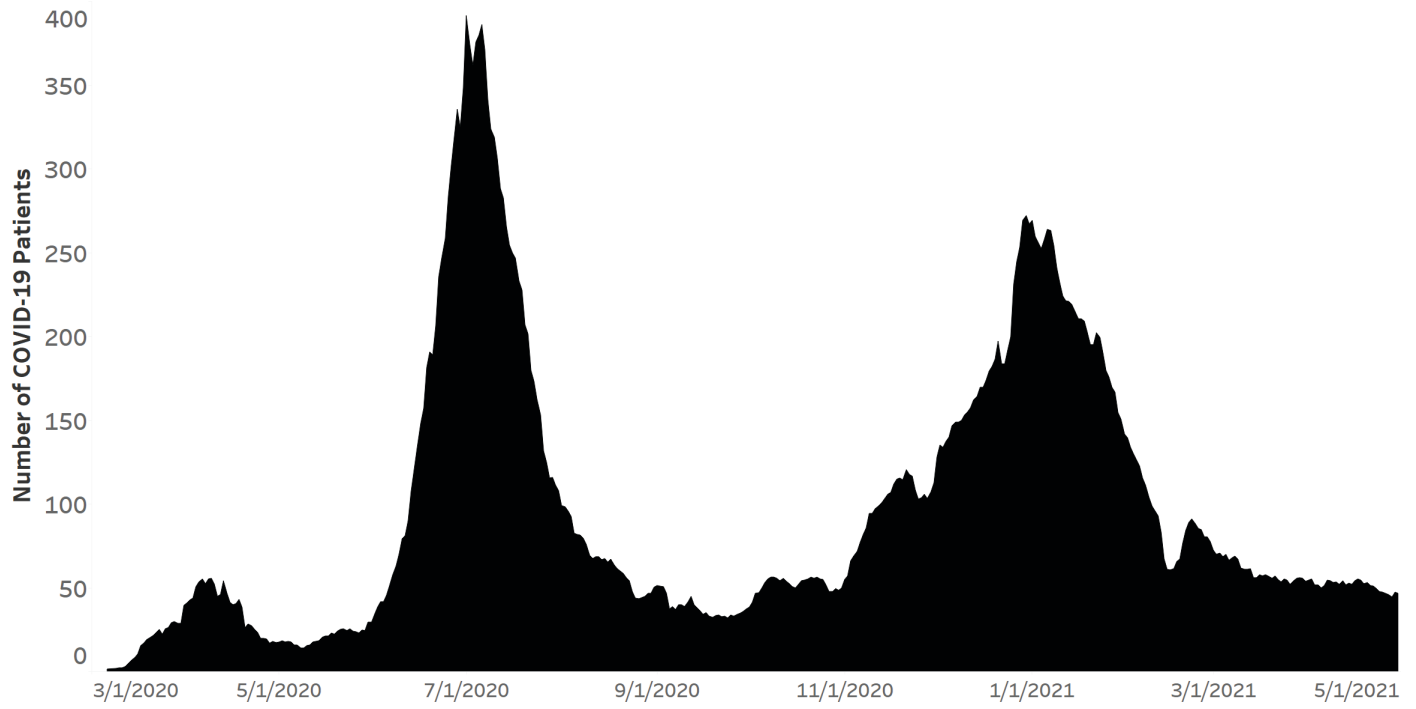



Figure 2

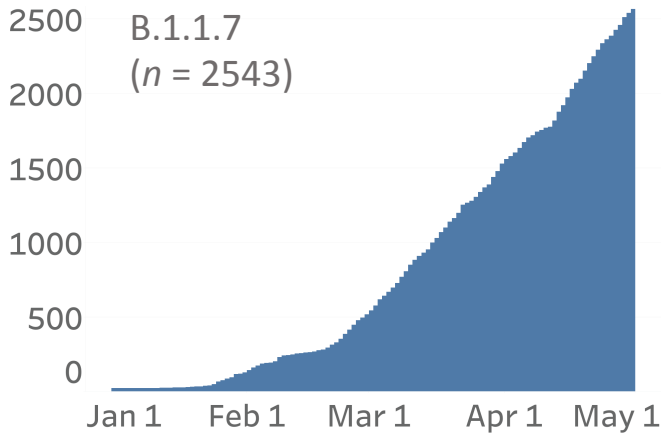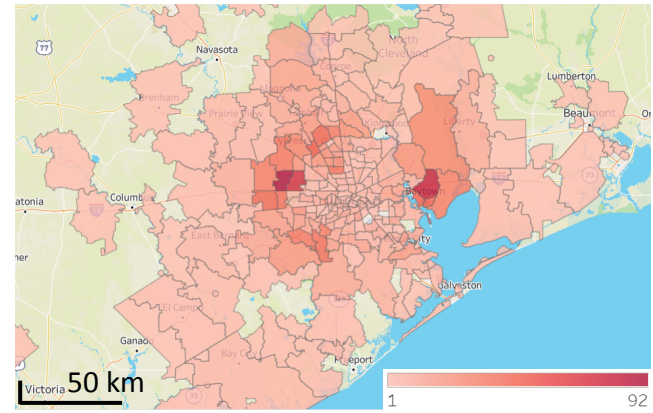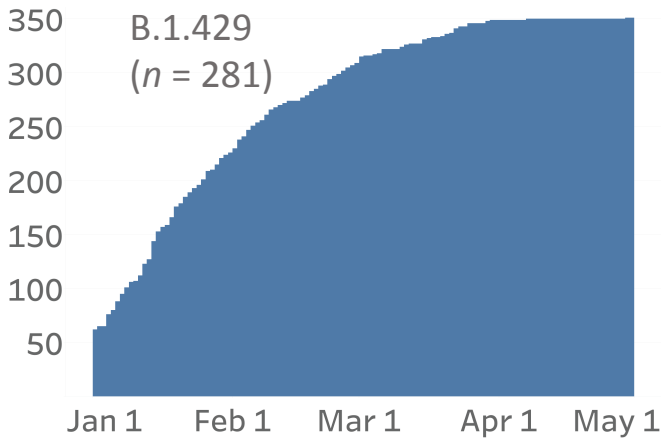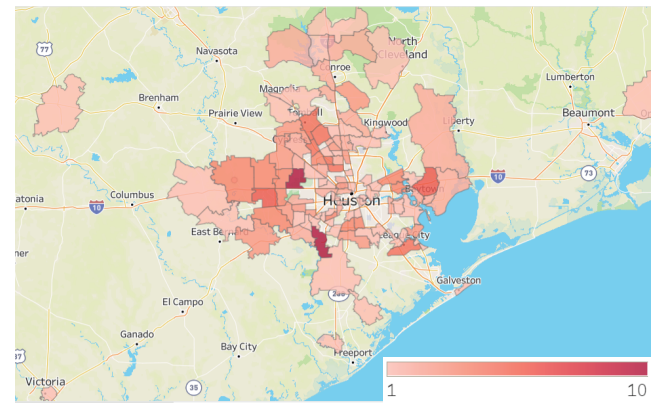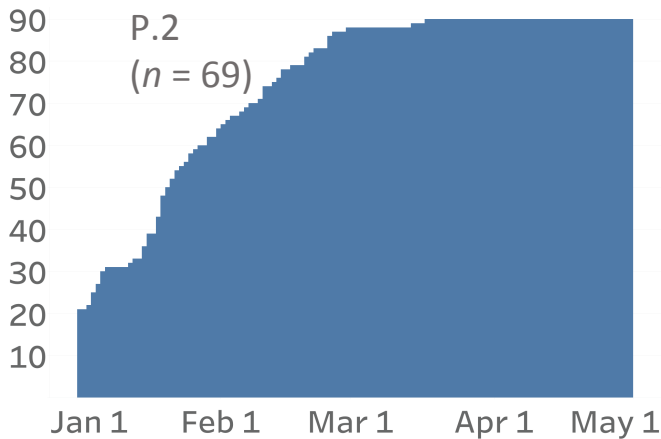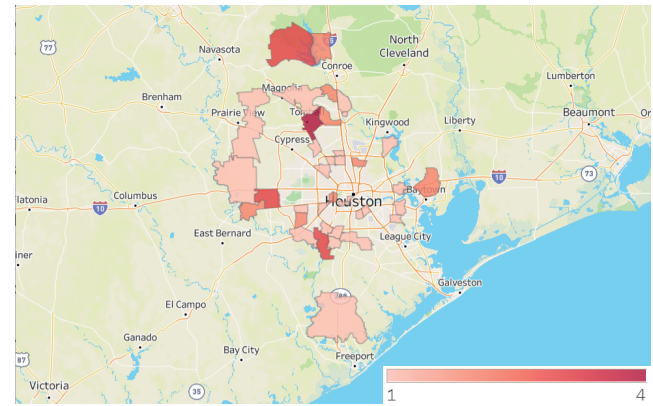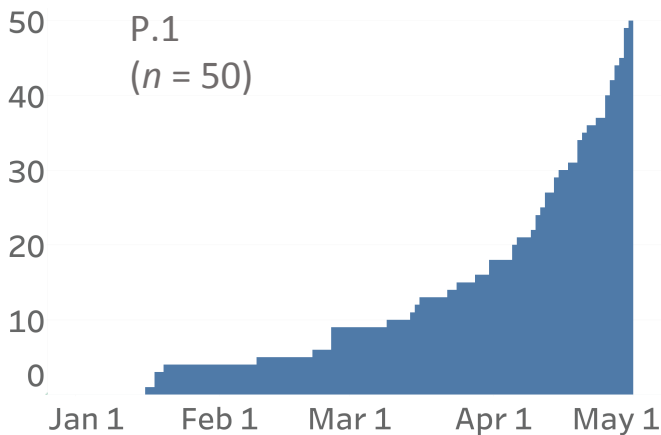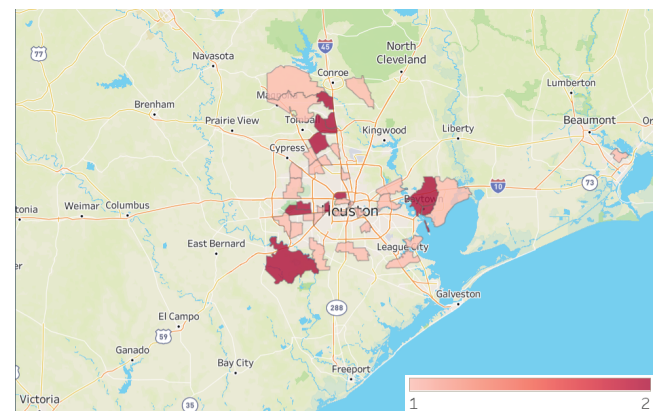

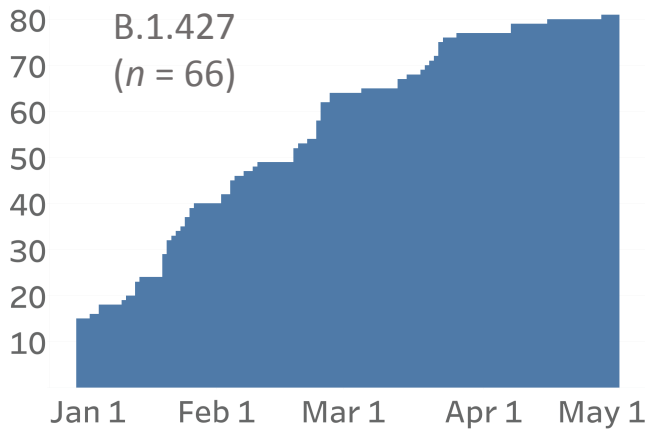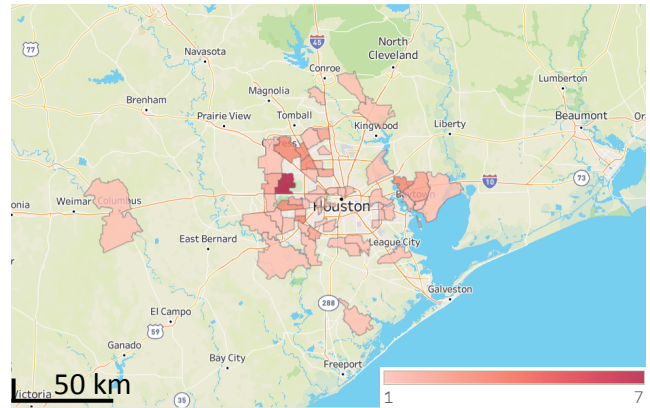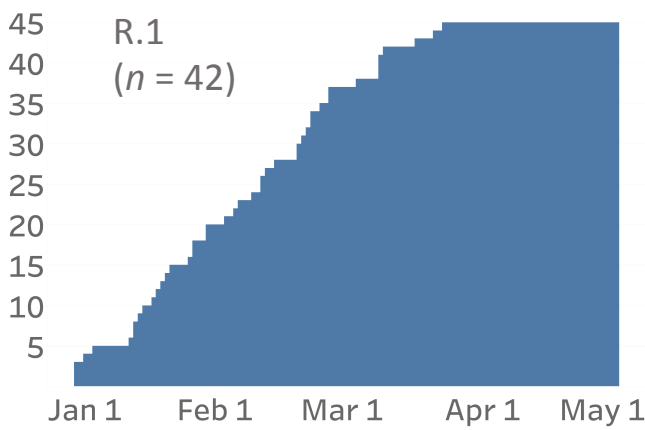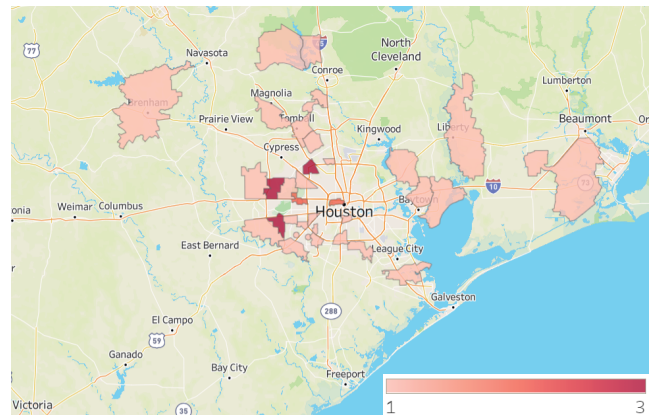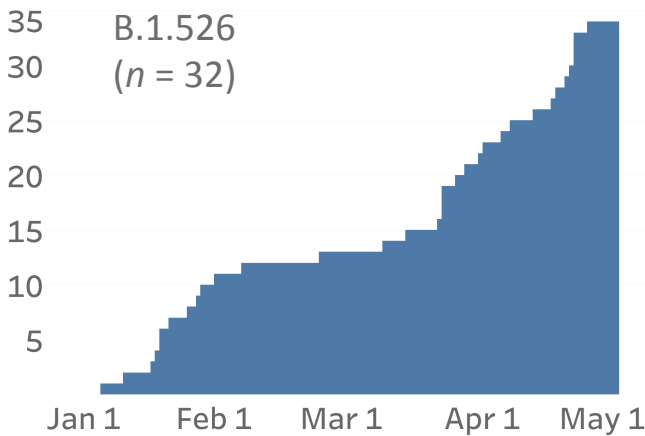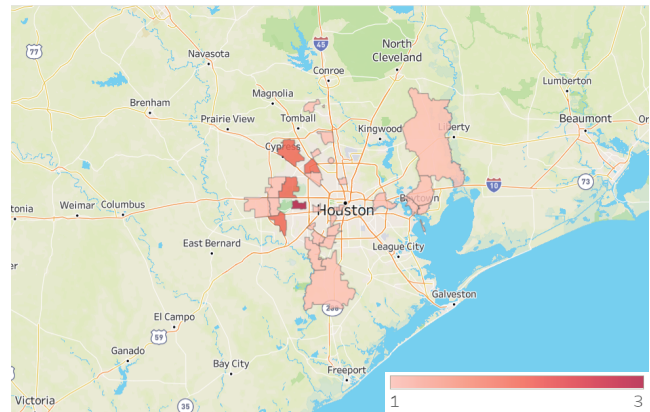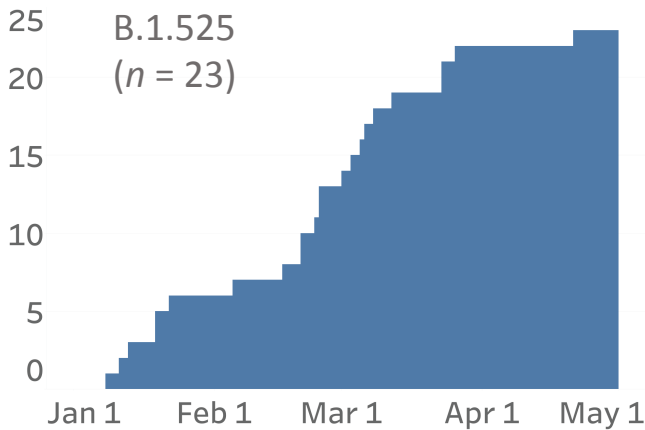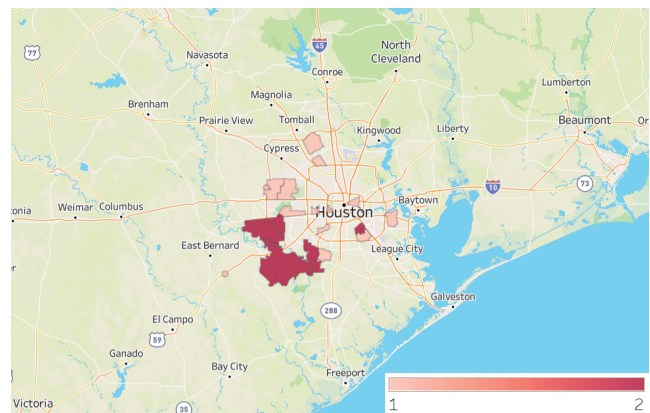

Figure 3

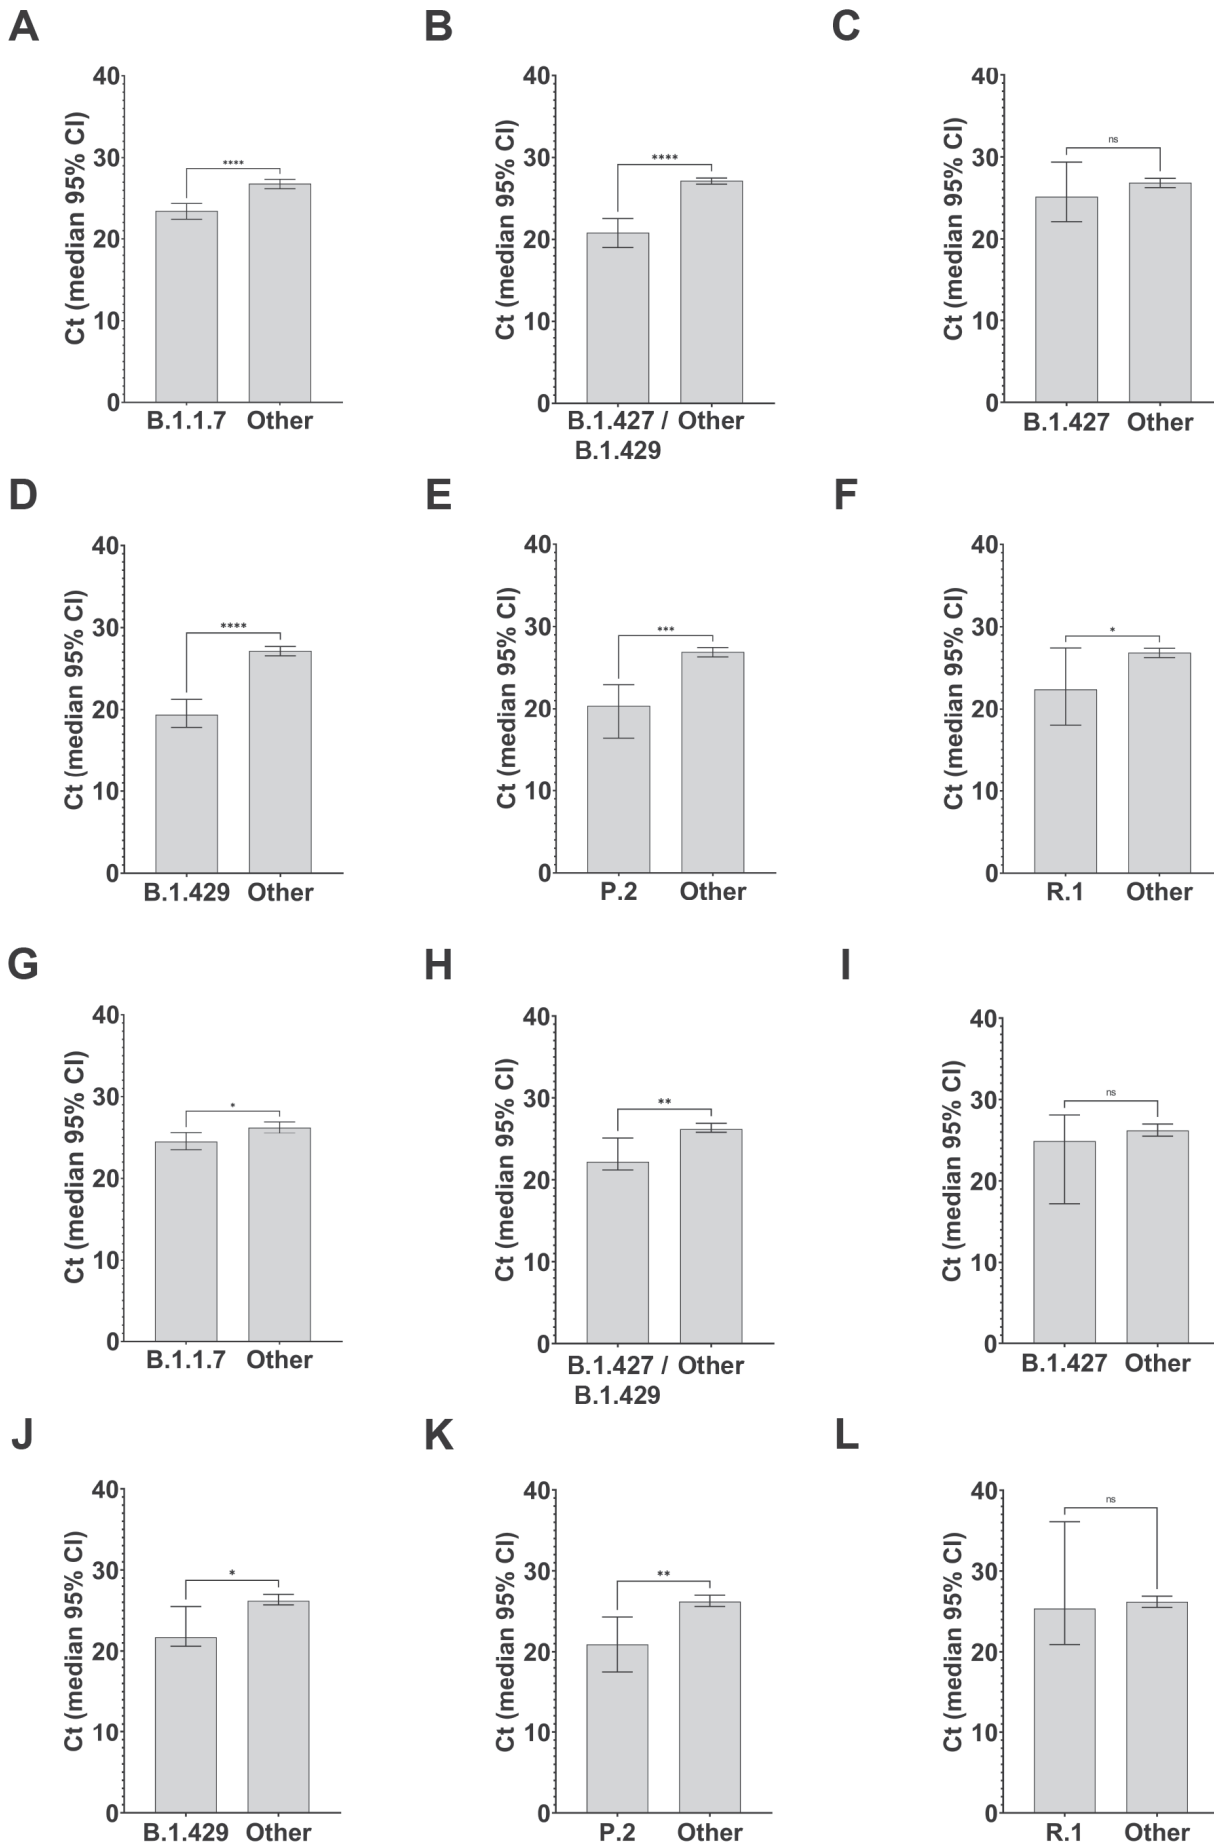

Source: https://medrxiv.org/content/10.1101/2021.05.20.21257552v1.full.pdf
